# Supplementary material for: Apicomplexan-like parasites are polyphyletic and widely but selectively dependent on cryptic plastid organelles
Source: eLife journal article supplement (doi:10.7554/elife.49662), 2019-08-16
Supplement: supp [file elife-49662-supp-v1.zip]

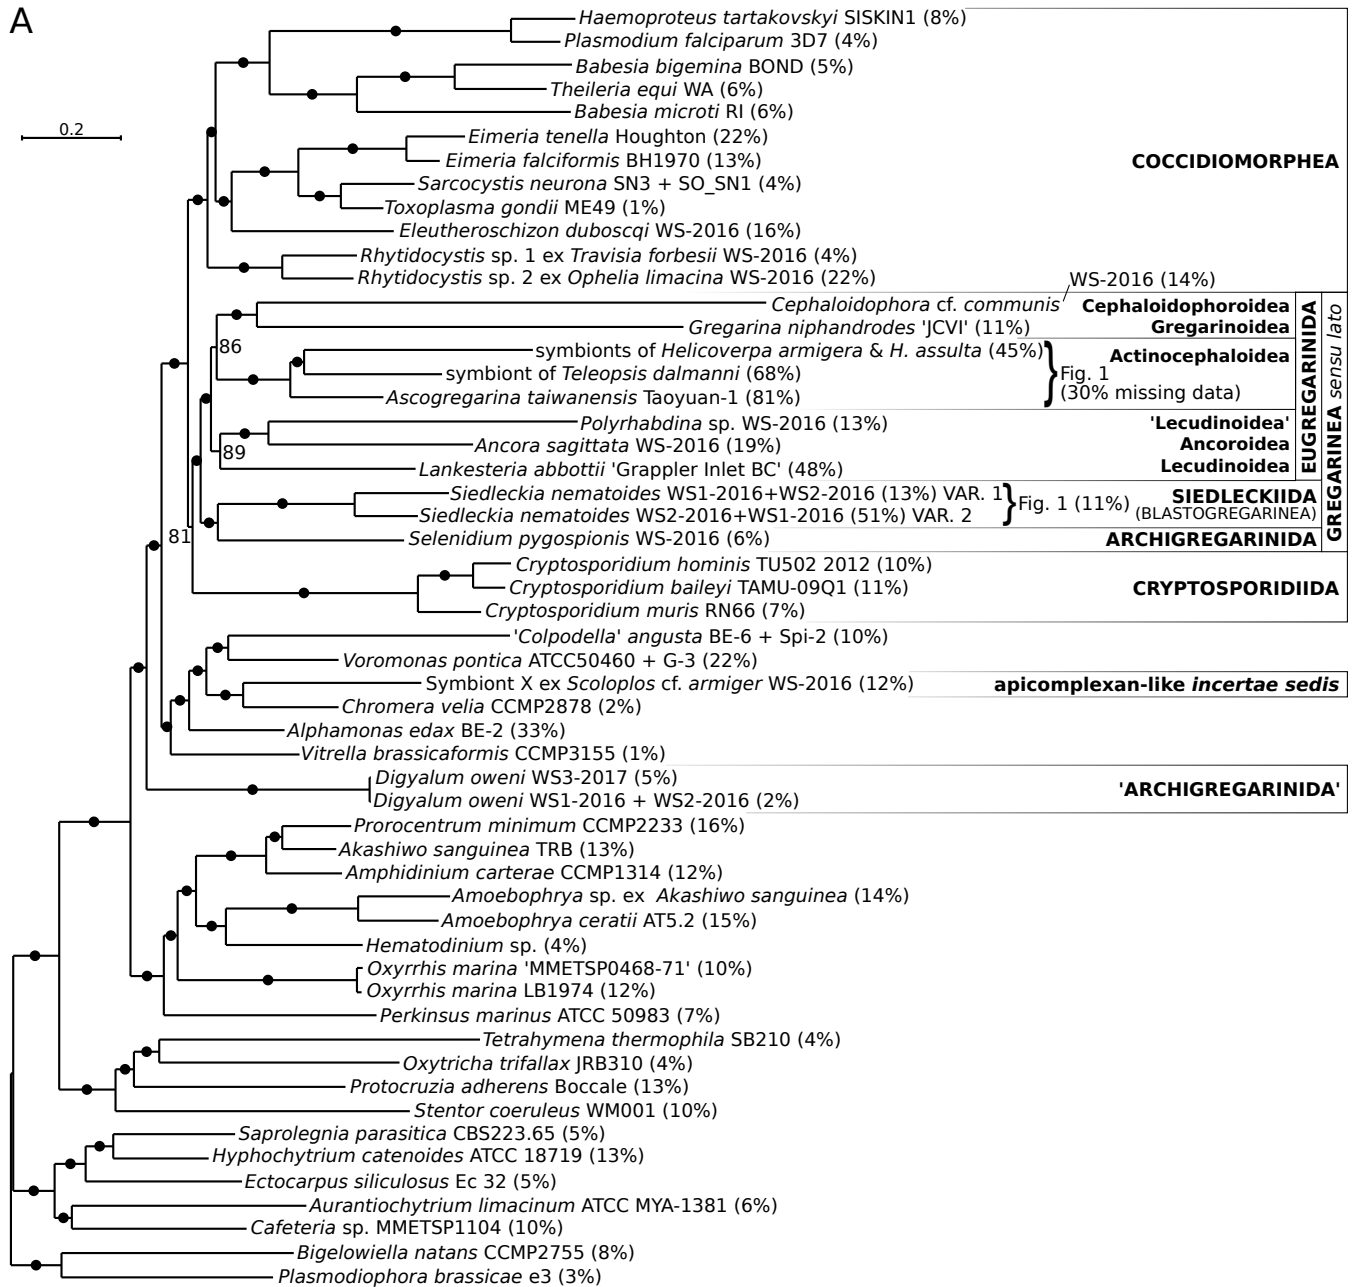

**B**

| Internal branch \ Dataset (UFBoot2 support)       | Fig.1 | Fig.1 -Gre | Fig.1 -Cep | Fig.1 -Gre,-Cep |
|---------------------------------------------------|-------|------------|------------|-----------------|
| Actinocephaloidea + (Gregarina + Cephaloidophora) | 100   | 98         | 100        | n.a.            |
| Lankesteria + (Ancora + Polyrhabdina)             | 100   | 98         | 100        | 100             |
| Cryptosporidiida + Gregarina s.l.                 | 79    | 77         | 78         | 65              |
| All other                                         | 100   | 100        | 100        | 100             |
