# Supplementary material for: Apicomplexan-like parasites are polyphyletic and widely but selectively dependent on cryptic plastid organelles
Source: eLife journal article supplement (doi:10.7554/elife.49662), 2019-08-16
Supplement: supp [file elife-49662-supp-v1.zip]

*Plafal*  
: I I I I I L L I Q I I I L K N E F Y I K K F # # Y T N F K  
# # # L # F Y # F K L L F # K M N F I L K N F N N I O I L N  
N N N Y N F I N S N Y Y F K K \* I L Y # K I L I I Y K F # I  
AATAATAATTATAATTTTATTAATTCAAATTATTATTTAAAAAATGAATTTTATTTAAAAAATTTTAAATAATATACAAATTTTAAAT

*Babmic*  
: # # Y Y # K I I L I I I K I Y I L W # V # I # I I L I I K  
Y N N I I K K L Y S L L # K F I Y Y D K F K Y K L Y # L # K  
I I I L L K N Y T H Y Y K N L Y T M I S L N I N Y I N Y K N  
ATAATAATATTATTAATAATTAATACTCATTATTATAAAAATTTATATACTATGATAAGTTTAAATATAAATTATATTAATTATAAAAA

*Eimten*  
: L L I # # N V K K K L # F N L K C F # K Y F I L N # K K K  
Y Y # F N K M # K K N Y N L I # N V F K S I L Y # I K K K K  
T I N L I K C K K K I I I # F K M F L K V F Y T K L K K K N  
ACTATTAAATTTAATAAAATGTAAAAAATAATTAATTTAAATGTTTTAAAAAGTATTTTAACTAAATTAATAAAAAA

*Toxgon*  
: # S L # Q I H L I Y N Y R K L Y N V L I K # Y L I N R F # I  
N H Y N K F T # Y T I I E N Y I M Y # # N N I # # T D F K F  
L I T I T N S L N I O L + K I I # C I N K I I F N K O I L N  
TAATCACTATAACAAATTCATTAAATATACAATTATAGAAAAATTAATAATGTATTAAATAAAATAATTTAATAAACAGATTTTAAAT

*corWK*  
: I \* V F V \* N I Y I Y L L I K M L T V K E Q I N K O L G L I  
# Y E F L Y E I Y I Y I Y # L K C # L L R N K L I N N W A Y  
N M S F C M K Y I Y I F I N # N V N C # G T N # # T I G L T  
AATATGAGTTTTGTATGAAATATATATATATTTATTAATTAATAATGTTAACTGTTAAGGAACAAATTAATAAACAAATTTGGGCTTAC

*Eleddub*  
: L I N I L Y # # A K K # # F K Y L T L K D V V F Y F L # K V  
Y # # I F F I N K L K N N N L N I # P # K M S F S I S Y K K  
T N K Y S L L I S # K I I I # I F N P K R C R F L F P I K S  
ACTAATAAATATTCTTTATTAATAAGCTAAAAAATAAATTTAAATATTTAACCCTAAAAGATGTCGTTTTCTATTTCTATAAAAAGT

*Sienem*  
: I V I N # F # L I M V # L G M L I Y N Y V L T F K Y L S T L  
< + # # I N F N # # W F N W V C # Y I I T F # L L N I Y L L  
N S N K L I L T N N G L I G Y V N I # L R F N F # I F I Y F  
AATAGTAATAAATTAATTTAACTAATAATGGTTTAAATTTGGGTATGTTAATATATAATACGTTTTAACTTTTAAATATTTATCTACTTT

*Selpyg*  
: # M Y Y F K K K Q H I K L N Y N D Y T # H K F F K K S # N  
I K Y T I L K K N N M L N # I M M T M L N M N F L K S L K M  
L N M L F # K K T T Y # I K L # W L Y L T # I F # K V L K +  
TTAAATATACTATTTTAAAAAACAACATATTAAATTAATTAATGACTATACCTAACATAAATTTTAAAAAGTCTTAAATAT
