# Supplementary material for: Apicomplexan-like parasites are polyphyletic and widely but selectively dependent on cryptic plastid organelles
Source: eLife. 2019 Aug 16;8:e49662. doi: 10.7554/eLife.49662 (PMC6733595; doi:10.7554/eLife.49662)
Supplement: Supplementary file 1. [file elife-49662-supp1.xlsx]

## Sheet: Sheet1
Table S1: Information about parasites collected (single quotation marks indicate problematic affiliations; asterisk denotes a species complex)
Apicomplexan group	Organism	Host species	Date host collected	Host collection coordinates	Parasite cells isolated	Parasite stage	No. of hosts used	Host localization	Date cells isolated	Isolated by	Used 30% ethanol to detach cells	Washed cells in seawater	Seawater in final sample	No. of PCR cycles in cDNA amplification	Name of sequenced isolate
'protococcidians’	Eleutheroschizon duboscqi	Scoloplos cf. armiger	12.8.2016	66°33'11"N, 33°06'21"E	~20-25	trophozoite	1	gut	13.8.2016	TGS	yes	1x	2 ul	21 (combined)	WS-2016
'protococcidians’	Eleutheroschizon duboscqi	Scoloplos cf. armiger	12.8.2016	66°33'12"N, 33°06'34"E	9	trophozoite	1	gut	18.8.2016	TGS	yes	1x	2 ul
'agamococcidians’	Rhytidocystis sp. 1	Travisia forbesii	18.8.2016	66°33'12"N, 33°06'34"E	19	trophozoite	1	gut	23.8.2016	GGP		3x	2 ul	21	WS-2016
'agamococcidians’	Rhytidocystis sp. 2	Ophelia limacina	18.8.2016	66°33'12"N, 33°06'34"E	49	trophozoite	3	gut	24.8.2016	GGP		3x	3 ul	20	WS-2016
eugregarines: 'Lecudinoidea'	Polyrhabdina sp.	Pygospio elegans	14.8.2016	66°33'11"N, 33°06'21"E	19	trophozoite	5	gut	17.8.2016	GGP+JJ		3x	2 ul	21	WS-2016
eugregarines: Ancoroidea	Ancora sagittata	Capitella capitata	21.8.2016	66º33'12'’N, 33º06'17''E	1	trophozoite	1	gut	23.8.2016	TGS		1x	2 ul	30	WS-2016
eugregarines: Cephaloidophoroidea	Cephaloidophora cf. communis	Balanus balanus	21.8.2016	66°33'22"N, 33°06'30"E	66	trophozoite	2	gut	24.8.2016	TGS		4x	2 ul	20	WS-2016
blastogregarines	Siedleckia nematoides	Scoloplos cf. armiger	12.8.2016	66°33'12"N, 33°06'34"E	~50	trophozoite	1	gut	13.8.2016	GGP		2x	5 ul	25	WS1-2016
blastogregarines	Siedleckia nematoides	Scoloplos cf. armiger	12.8.2016	66°33'12"N, 33°06'34"E	24	trophozoite	1	gut	13.8.2016	TGS		2x	5 ul	25	WS2-2016
archigregarines	Selenidium pygospionis	Pygospio elegans	14.8.2016	66°33'11"N, 33°06'21"E	~70	trophozoite	5	gut	17.8.2016	JJ		2x	2 ul	21	WS-2016
incertae sedis	Symbiont X	Scoloplos cf. armiger	12.8.2016	66°33'12"N, 33°06'34"E	~50	trophozoite	1	gut	13.8.2016	GGP		3x	5 ul	26	WS-2016
'archigregarines’	Digyalum oweni	Littorina obtusata*	12.8.2016	66°33'12"N, 33°06'34"E	3	trophozoite	1	gut	15.8.2016	TGS	yes	3x	3 ul	21 (combined)	WS1-2016
'archigregarines’	Digyalum oweni	Littorina obtusata*	12.8.2016	66°33'12"N, 33°06'34"E	28	trophozoite	1	gut	15.8.2016	TGS	yes	3x	2 ul
'archigregarines’	Digyalum oweni	Littorina obtusata*	12.8.2016	66°33'12"N, 33°06'34"E	~10	trophozoite	1	gut	17.8.2016	GGP		2x	3 ul	21	WS2-2016
'archigregarines’	Digyalum oweni	Littorina saxatilis	01.9.2017	66°18'57"N, 33°49'58"E	30	trophozoite	2	gut	01.9.2017	TSM		2x	3 ul	25	WS3-2017
