# Supplementary material for: Apicomplexan-like parasites are polyphyletic and widely but selectively dependent on cryptic plastid organelles
Source: eLife. 2019 Aug 16;8:e49662. doi: 10.7554/eLife.49662 (PMC6733595; doi:10.7554/eLife.49662)
Supplement: Supplementary file 2. [file elife-49662-supp2.xlsx]

## Sheet: Sheet1
Table S2: Sources of sequence datasets used in this study (single quotation marks indicate arbitrarily assigned strain name)
Group	Organism	Strain/isolate	Fig. S1A	Fig. 1	Dataset obtained	Dataset version	Dataset source
apicomplexans	Ancora sagittata	WS-2016	yes	yes	Transcriptome	PRJNA557242	https://www.ncbi.nlm.nih.gov/bioproject/PRJNA557242
apicomplexans	Ascogregarina taiwanensis	Taoyuan-1	yes	yes	Genome survey	ASM17223v1	https://www.ncbi.nlm.nih.gov/bioproject/PRJNA27765
apicomplexans	symbiont of Helicoverpa armigera	GR (host)	yes		Transcriptome	PRJNA244590	https://www.ncbi.nlm.nih.gov/bioproject/?term=PRJNA244590
apicomplexans	symbiont of Helicoverpa assulta	---	yes		Transcriptome	PRJNA263973	https://www.ncbi.nlm.nih.gov/bioproject/?term=PRJNA263973
apicomplexans	symbiont of Teleopsis dalmanni	Gombak (host)	yes		Transcriptome	PRJNA240197	https://www.ncbi.nlm.nih.gov/bioproject/?term=PRJNA240197
apicomplexans	Babesia bigemina	BOND	yes	yes	Genome	PiroplasmaDB-36	https://piroplasmadb.org/common/downloads/
apicomplexans	Babesia microti	RI	yes	yes	Genome	PiroplasmaDB-36	https://piroplasmadb.org/common/downloads/
apicomplexans	Cephaloidophora cf. communis	WS-2016	yes	yes	Transcriptome	PRJNA557242	https://www.ncbi.nlm.nih.gov/bioproject/PRJNA557242
apicomplexans	Cryptosporidium bailey	TAMU-09Q1	yes	yes	Genome	CryptoDB-36	https://cryptodb.org/common/downloads/
apicomplexans	Cryptosporidium hominis	TU502_2012	yes	yes	Genome	CryptoDB-36	https://cryptodb.org/common/downloads/
apicomplexans	Cryptosporidium muris	RN66	yes	yes	Genome	CryptoDB-36	https://cryptodb.org/common/downloads/
apicomplexans	Eimeria falciformis	BH1970	yes	yes	Genome	ToxoDB-36	https://toxodb.org/common/downloads/
apicomplexans	Eimeria tenella	Houghton	yes	yes	Genome	ToxoDB-36	https://toxodb.org/common/downloads/
apicomplexans	Eleutheroschizon duboscqi	WS-2016	yes	yes	Transcriptome	PRJNA557242	https://www.ncbi.nlm.nih.gov/bioproject/PRJNA557242
apicomplexans	Gregarina niphandrodes	'JCVI'	yes	yes	Genome	GNI3	https://www.ncbi.nlm.nih.gov/bioproject/PRJNA259233
apicomplexans	Haemoproteus tartakovskyi	SISKIN1	yes	yes	Genome	ASM162512v1	http://mbio-serv2.mbioekol.lu.se/Malavi/Downloads/Haemoproteus_tartakovskyi/
apicomplexans	Lankesteria abbottii	'Grappler Inlet BC'	yes	yes	Transcriptome	MMETSP0372	http://datacommons.cyverse.org/browse/iplant/home/shared/imicrobe/projects/104/samples/1822/MMETSP0372.pep.fa	https://de.cyverse.org/anon-files//iplant/home/shared/imicrobe/projects/104/samples/1822/MMETSP0372.pep.fa
apicomplexans	Plasmodium falciparum	3D7	yes	yes	Genome	PlasmoDB-36	https://plasmodb.org/common/downloads/
apicomplexans	Polyrhabdina sp.	WS-2016	yes	yes	Transcriptome	PRJNA557242	https://www.ncbi.nlm.nih.gov/bioproject/PRJNA557242
apicomplexans	Rhytidocystis sp. 1	WS-2016	yes	yes	Transcriptome	PRJNA557242	https://www.ncbi.nlm.nih.gov/bioproject/PRJNA557242
apicomplexans	Rhytidocystis sp. 2	WS-2016	yes	yes	Transcriptome	PRJNA557242	https://www.ncbi.nlm.nih.gov/bioproject/PRJNA557242
apicomplexans	Sarcocystis neurona	SN3	yes	yes	Genome	ToxoDB-36	https://toxodb.org/common/downloads/
apicomplexans	Sarcocystis neurona	SO_SN1			Genome	ToxoDB-36	https://toxodb.org/common/downloads/
apicomplexans	Selenidium pygospionis	WS-2016	yes	yes	Transcriptome	PRJNA557242	https://www.ncbi.nlm.nih.gov/bioproject/PRJNA557242
apicomplexans	Siedleckia nematoides	WS1-2016	yes	yes	Transcriptome	PRJNA557242	https://www.ncbi.nlm.nih.gov/bioproject/PRJNA557242
apicomplexans	Siedleckia nematoides	WS2-2016	yes	yes	Transcriptome	PRJNA557242	https://www.ncbi.nlm.nih.gov/bioproject/PRJNA557242
apicomplexans	Theileria equi	WA	yes	yes	Genome	PiroplasmaDB-36	https://piroplasmadb.org/common/downloads/
apicomplexans	Toxoplasma gondii	ME49	yes	yes	Genome	ToxoDB-36	https://toxodb.org/common/downloads/
chrompodellids	Alphamonas edax	BE-2	yes	yes	Transcriptome	GDKI00000000.1	https://www.ncbi.nlm.nih.gov/Traces/wgs/?val=GDKI01
chrompodellids	Chromera velia	CCMP2878	yes	yes	Genome	CryptoDB-36	https://cryptodb.org/common/downloads/
chrompodellids	Chromera velia	CCMP2878	yes	yes	Transcriptome	MMETSP0290	http://datacommons.cyverse.org/browse/iplant/home/shared/imicrobe/projects/104/samples/2225
chrompodellids	Colpodella angusta	BE-6	yes	yes	Transcriptome	GDKJ01000000.1	https://www.ncbi.nlm.nih.gov/Traces/wgs/?val=GDKJ01
chrompodellids	Colpodella angusta	Spi-2			Transcriptome	GDKK00000000.1	https://www.ncbi.nlm.nih.gov/Traces/wgs/?val=GDKK01
chrompodellids	Symbiont X ex Scoloplos cf. armiger	WS-2016	yes	yes	Transcriptome	PRJNA557242	https://www.ncbi.nlm.nih.gov/bioproject/PRJNA557242
chrompodellids	Vitrella brassicaformis	CCMP3155	yes	yes	Genome	CryptoDB-36	https://cryptodb.org/common/downloads/
chrompodellids	Vitrella brassicaformis	CCMP3155	yes	yes	Transcriptome	MMETSP0288	http://datacommons.cyverse.org/browse/iplant/home/shared/imicrobe/projects/104/samples/2224
chrompodellids	Voromonas pontica	G-3	yes	yes	Transcriptome	GDKH00000000.1	https://www.ncbi.nlm.nih.gov/Traces/wgs/?val=GDKH01
chrompodellids	Voromonas pontica	ATCC50640			Transcriptome	Gile et al., 2014, PLOS One	obtained from Gillian Gile
Digyalum	Digyalum oweni	WS1-2016	yes	yes	Transcriptome	PRJNA557242	https://www.ncbi.nlm.nih.gov/bioproject/PRJNA557242
Digyalum	Digyalum oweni	WS2-2016	yes	yes	Transcriptome	PRJNA557242	https://www.ncbi.nlm.nih.gov/bioproject/PRJNA557242
Digyalum	Digyalum oweni	WS3-2017	yes	yes	Transcriptome	PRJNA556465	https://www.ncbi.nlm.nih.gov/bioproject/?term=PRJNA556465
dinoflagellates	Amoebophrya ceratii	AT5.2	yes	yes	Genome	John et al., 2019	https://advances.sciencemag.org/content/suppl/2019/04/19/5.4.eaav1110.DC1
dinoflagellates	Amoebophrya sp.	ex Akashiwo sanguinea	yes	yes	Transcriptome	SRX730945, SRX730946	https://www.ncbi.nlm.nih.gov/sra/?term=txid1294205[Organism:noexp]
dinoflagellates	Amphidinium carterae	CCMP1314	yes	yes	Transcriptome	combined MMETSP0398, MMETSP0399, MMETSP0258, MMETSP0259	ftp://ftp.imicrobe.us/camera/combined_assemblies/
dinoflagellates	Oxyrrhis marina	LB1974	yes	yes	Transcriptome	combined MMETSP1424, MMETSP1425, MMETSP1426	http://datacommons.cyverse.org/browse/iplant/home/shared/imicrobe/camera/camera_mmetsp_ncgr/combined_assemblies/Oxyrrhis-marina-LB1974	https://de.cyverse.org/anon-files//iplant/home/shared/imicrobe/camera/camera_mmetsp_ncgr/combined_assemblies/Oxyrrhis-marina-LB1974/Oxyrrhis-marina-LB1974.pep.fa
dinoflagellates	Oxyrrhis marina	'MMETSP0468-71'	yes		Transcriptome	combined MMETSP0468, MMETSP0469, MMETSP0470, MMETSP0471	http://datacommons.cyverse.org/browse/iplant/home/shared/imicrobe/camera/camera_mmetsp_ncgr/combined_assemblies/Oxyrrhis-marina/Oxyrrhis-marina.pep.fa	https://de.cyverse.org/anon-files//iplant/home/shared/imicrobe/camera/camera_mmetsp_ncgr/combined_assemblies/Oxyrrhis-marina/Oxyrrhis-marina.pep.fa
dinoflagellates	Prorocentrum minimum	CCMP2233	yes	yes	Transcriptome	combined MMETSP0267, MMETSP0268, MMETSP0269	ftp://ftp.imicrobe.us/camera/combined_assemblies/
dinoflagellates	Symbiodinium minutum	Mf1.05b	yes	yes	Genome	v1.0 (v1.2 proteins)	http://marinegenomics.oist.jp/symb/viewer/download?project_id=21
perkinsids	Perkinsus marinus	ATCC 50983	yes	yes	Genome	JCVI_PMG_1.0	https://www.ncbi.nlm.nih.gov/bioproject/PRJNA12737
ciliates	Stentor coeruleus	WM001	yes	yes	Genome	ASM197095v1	https://www.ncbi.nlm.nih.gov/bioproject/?term=PRJNA352242
ciliates	Tetrahymena thermophila	SB210	yes	yes	Genome	June2014	http://ciliate.org/index.php/home/downloads
ciliates	Oxytricha trifallax	JRB310	yes	yes	Genome	Oxytricha_trifallax_022112	http://oxy.ciliate.org/index.php/home/downloads
ciliates	Protocruzia adherens	Boccale	yes	yes	Transcriptome	MMETSP0216	http://datacommons.cyverse.org/browse/iplant/home/shared/imicrobe/projects/104/samples/1776/MMETSP0216.pep.fa	https://de.cyverse.org/anon-files//iplant/home/shared/imicrobe/projects/104/samples/1776/MMETSP0216.pep.fa
stramenopiles	Hyphochytrium catenoides	ATCC 18719	yes	yes	Genome	hypho_2016	https://github.com/guyleonard/hyphochytrium/blob/master/gene_predictions/proteins/2016/second_pass.all.maker.proteins.fasta	https://www.ncbi.nlm.nih.gov/bioproject/PRJEB13950/
stramenopiles	Aurantiochytrium limacinum	ATCC MYA-1381	yes	yes	Genome	v.1 filtered models	https://genome.jgi.doe.gov/portal/pages/dynamicOrganismDownload.jsf?organism=Aurli1
stramenopiles	Saprolegnia parasitica	CBS223.65	yes	yes	Genome	GCA_000151545.2	https://www.ncbi.nlm.nih.gov/bioproject/36583
stramenopiles	Cafeteria sp.	MMETSP1104	yes	yes	Transcriptome	MMETSP1104	http://datacommons.cyverse.org/browse/iplant/home/shared/imicrobe/projects/104/samples/2175
stramenopiles	Ectocarpus siliculosus	Ec 32 (CCAP 1310/04)	yes	yes	Genome	GCA_000310025.1	https://www.ncbi.nlm.nih.gov/bioproject/PRJEA42625
rhizarians	Plasmodiophora brassicae	e3	yes	yes	Genome	pbe3.h15	https://www.ncbi.nlm.nih.gov/bioproject/PRJEB8376
rhizarians	Bigelowiella natans	CCMP2755	yes	yes	Genome	v1.0	https://genome.jgi.doe.gov/portal/Bigna1/Bigna1.download.ftp.html
