# Supplementary material for: Apicomplexan-like parasites are polyphyletic and widely but selectively dependent on cryptic plastid organelles
Source: eLife. 2019 Aug 16;8:e49662. doi: 10.7554/eLife.49662 (PMC6733595; doi:10.7554/eLife.49662)
Supplement: Supplementary file 3. [file elife-49662-supp3.xlsx]

## Sheet: Sheet1
Table S3: Results of seven tree topology tests as computed in IQ-TREE (of 105 tested topologies those not rejected at p=0.001 in at least one test are listed; those not rejected at p=0.01 are highlighted in bold)
Tree topology	logL	deltaL	bp-RELL	p-KH	p-SH	p-WKH	p-WSH	c-ELW	p-AU
coccidiomorphs,(cryptosporidians,(eugregarines,(blastogregarines,archigregarines)))	-4.48064e+06	0	0.993	0.996	1	0.996	1	0.993	0.998
(cryptosporidians,coccidiomorphs),(eugregarines,(blastogregarines,archigregarines))	-4.48076e+06	116.93	0.003	0.0044	0.488	0.0044	0.061	0.00301	0.00556
cryptosporidians,(coccidiomorphs,(eugregarines,(blastogregarines,archigregarines)))	-4.48076e+06	117.08	0.0038	0.0042	0.484	0.0042	0.0642	0.00389	0.00407
coccidiomorphs,((cryptosporidians,eugregarines),(blastogregarines,archigregarines))	-4.48085e+06	213.47	0	0.0002	0.115	0.0002	0.0024	8.9e-09	0.000483
cryptosporidians,(eugregarines,(blastogregarines,(archigregarines,coccidiomorphs)))	-4.48268e+06	2038.7	0	0	0	0	0	0	0.00154
cryptosporidians,(blastogregarines,(eugregarines,(archigregarines,coccidiomorphs)))	-4.48275e+06	2109.7	0	0	0	0	0	0	0.00112
eugregarines,(cryptosporidians,(archigregarines,(blastogregarines,coccidiomorphs)))	-4.48289e+06	2250.3	0	0	0	0	0	0	0.00157
