# Supplementary material for: Apicomplexan-like parasites are polyphyletic and widely but selectively dependent on cryptic plastid organelles
Source: eLife. 2019 Aug 16;8:e49662. doi: 10.7554/eLife.49662 (PMC6733595; doi:10.7554/eLife.49662)
Supplement: Supplementary file 4. [file elife-49662-supp4.xlsx]

## Sheet: Sheet1
Table S4: Names, abbreviations, accessions and localizations of plastidial proteins and modules (plastid-localized=green; mitochondrion-localized=blue; endoplasmic reticulum=red)
Module	Abbreviation	Protein name	Plasmodium falciparum – protein ID	Localization – Plasmodium spp.	Plastid BioID – Plasmodium falciparum (Boucher et al., 2018)	Toxoplasma gondii – protein ID	Localization – Toxoplasma gondii	Babesia microti – protein ID	Localization – Babesia spp.
TPT: Triosephosphate translocon	oTPT (APT)	Triosephosphate/phosphate transporter	PF3D7_0508300	Mullin et al., 2006, PNAS	YES	TGME49_261070	Fleige et al., 2007, Eukaryot Cell; Karnataki et al., 2007, Mol Microbiol	BMR1_01G01470
	iTPT	Triosephosphate/phosphate transporter	PF3D7_0530200	Mullin et al., 2006, PNAS	YES	ABSENT	ABSENT	BMR1_03g01020
PK-II: Pyruvate kinase	PK-II (PyKII)	Pyruvate kinase	PF3D7_1037100	Maeda et al., 2009, Parasitol Int	YES	TGME49_299070	Fleige et al., 2007, Eukaryot Cell	BMR1_01G02635
TPI-II: Triosephosphate isomerase	TPI-II	Triosephosphate isomerase	PF3D7_0318800		NO	TGME49_233500	Fleige et al., 2007, Eukaryot Cell	BmR1_04g06140
GAPDH-II: Glyceraldehyde-3-phosphate dehydrogenase	GAPDH-II	Glyceraldehyde-3-phosphate dehydrogenase	ABSENT	ABSENT	ABSENT	TGME49_269190 *4	Pino et al., 2007, PLOS Pathogens; Fleige et al., 2007, Eukaryot Cell	ABSENT	ABSENT
PGK-II: Phosphoglycerate kinase	PGK-II	Phosphoglycerate kinase	ABSENT	ABSENT	ABSENT	TGME49_222020	Fleige et al., 2007, Eukaryot Cell	ABSENT	ABSENT
ISP: Isoprenoid precursor biosynthesis, non-mevalonate pathway	DXS	1-deoxy-D-xylulose-5-phosphate synthase	PF3D7_1337200		YES	TGME49_208820		BMR1_03g00540
	IspC (DXR)	1-deoxy-D-xylulose-5-phosphate reductoisomerase	PF3D7_1467300	Baumeister et al., 2011, PLOS ONE	YES	TGME49_214850	Baumeister et al., 2011, PLOS ONE	BMR1_02g02665
	IspD	2-C-methyl-D-erythritol 4-phosphate cytidylyltransferase	PF3D7_0106900		YES	TGME49_306260		BMR1_01G02480
	IspE	4-diphosphocytidyl-2-C-methyl-D-erythritol kinase	PF3D7_0503100	Tonkin et al., 2004, Mol Biochem Parasitol	YES	TGME49_306550		BMR1_03g01890
	IspF	2-C-methyl-D-erythritol 2,4-cyclodiphosphate synthase	PF3D7_0209300		YES	TGME49_255690		BmR1_04g05000
	IspG	4-hydroxy-3-methylbut-2-en-1-yl diphosphate synthase	PF3D7_1022800 *1	Saggu et al., 2017, Int J Biol Macromolecules	YES	TGME49_262430		BMR1_03g01825
	IspH (LytB)	4-hydroxy-3-methylbut-2-enyl diphosphate reductase	PF3D7_0104400		YES	TGME49_227420	Nair et al., 2011, J Exp Medicine	BmR1_04g05255 *5	Cabaellero et al., 2012, Mol Biochem Parasitol
FDX: Ferredoxin redox system	Fd (PetF)	[2Fe-2S] ferredoxin	PF3D7_1318100	Kimata-Ariga et al., 2007, J Biochem	YES	TGME49_215070	Seeber et al., 2005, Curr Pharm Des	BMR1_01G03290
	FNR (PetH)	Ferredoxin NADP+ reductase	PF3D7_0623200		YES	TGME49_298990	Striepen et al., 2000, J Cell Biol	BmR1_04g09200
SUF: Iron-sulfur (Fe-S) cluster assembly, Suf pathway	NifU (NFU)	Iron-sulfur cluster assembly protein NifU	PF3D7_0921400 *2	Haussig et al., 2013, PLOS ONE	YES	TGME49_221922		BmR1_04g09280
	SufA	Iron-sulfur cluster assembly protein SufA	PF3D7_0522700 *2	Haussig et al., 2014, PLOS ONE	YES	TGME49_297925		ABSENT	ABSENT
	SufB (Ycf24)	Iron-sulfur cluster assembly protein SufB	PF3D7_API04700	PLASTID-ENCODED	NO	TGME49_300650	PLASTID-ENCODED	ABSENT	ABSENT
	SufC (Ycf16)	Iron-sulfur cluster assembly protein SufC	PF3D7_1413500	Kumar et al., 2011, Int J Parasitol	YES	TGME49_225800		ABSENT	ABSENT
	SufD	Iron-sulfur cluster assembly protein SufD	PF3D7_1103400 *2	Haussig et al., 2014, PLOS ONE	YES	TGME49_273445		ABSENT	ABSENT
	SufE	Iron-sulfur cluster assembly protein SufE	PF3D7_0206100	Gisselberg et al., 2013, PLOS Pathogens	YES	TGME49_277010		ABSENT	ABSENT
	SufS	SufS family cysteine desulfurase	PF3D7_0716600	Gisselberg et al., 2013, PLOS Pathogens	YES	TGME49_216170		BMR1_03g01415
PDH: Pyruvate dehydrogenase complex	PDHE1α	Pyruvate dehydrogenase subunit E1 alpha	PF3D7_1124500	Foth et al., 2005, Mol Microbiol	YES	TGME49_245670	Fleige et al., 2007, Eukaryot Cell	ABSENT	ABSENT
	PDHE1β	Pyruvate dehydrogenase subunit E1 beta	PF3D7_1446400		YES	TGME49_272290	Fleige et al., 2007, Eukaryot Cell	ABSENT	ABSENT
	PDHE2	Pyruvate dehydrogenase subunit E2	PF3D7_1020800	Foth et al., 2005, Mol Microbiol	YES	TGME49_206610	Fleige et al., 2007, Eukaryot Cell	ABSENT	ABSENT
	PDHE3	Pyruvate dehydrogenase subunit E3	PF3D7_0815900 *3	Pei et al., 2010, Mol Microbiol	YES	TGME49_305980	Fleige et al., 2007, Eukaryot Cell	ABSENT	ABSENT
FAS-II: Fatty acid biosynthesis and elongation, Type II pathway	ACC	Acetyl-CoA carboxylase	PF3D7_1469600 *3	Pei et al., 2010, Mol Microbiol	YES	TGME49_221320	Jelenska et al., 2001, PNAS	ABSENT	ABSENT
	ACP	Acyl carrier protein	PF3D7_0208500	Waller et al., 2000, EMBO J	YES	TGME49_264080	Waller et al., 1998, PNAS	BMR1_03g00127 *5	Cabaellero et al., 2012, Mol Biochem Parasitol
	ACPS	Acyl carrier protein synthase	PF3D7_0420200		YES	TGME49_203420		ABSENT	ABSENT
	FabD	Malonyl-CoA-acyl carrier protein transacylase	PF3D7_1312000		YES	TGME49_225990		ABSENT	ABSENT
	FabH	Beta-ketoacyl-acyl carrier protein synthase III	PF3D7_0211400	Waller et al., 2000, EMBO J	YES	TGME49_231890		ABSENT	ABSENT
	FabB/F	Beta-ketoacyl-acyl carrier protein synthase I/II	PF3D7_0626300		YES	TGME49_293590		ABSENT	ABSENT
	FabG	Beta-ketoacyl-acyl carrier protein reductase	PF3D7_0922900 *3	Vaughan et al., 2009, Cellular Microbiology	YES	TGME49_217740		ABSENT	ABSENT
	FabZ	D-3-hydroxyoctanoyl-acyl carrier protein dehydratase	PF3D7_1323000 *3	Vaughan et al., 2009, Cellular Microbiology	YES	TGME49_321570	Dautu et al., 2008, Parasitol Res	ABSENT	ABSENT
	FabI (ENR)	Enoyl-acyl carrier protein reductase	PF3D7_0615100	Yu et al., 2008, Cell Host Microbe	YES	TGME49_251930	Ferguson et al., 2005, Eukaryot Cell	ABSENT	ABSENT
LIP: Lipoic acid synthesis in the plastid	LipB	Octanoyl-ACP:protein transferase	PF3D7_0823600		YES	TGME49_315640		ABSENT	ABSENT
	LipA	Lipoic acid synthase	PF3D7_1344600	Wrenger and Muller, 2004, Mol Microbiol.	YES	TGME49_226400	Thomsen-Zieger et al., 2003, FEBS Lett	ABSENT	ABSENT
HEM: Tetrapyrrole biosynthesis	GTR (HemA)	Glutamyl-tRNA reductase	ABSENT	ABSENT	ABSENT	ABSENT	ABSENT	ABSENT	ABSENT
	GSA (HemL)	Glutamate-1-semialdehyde 2,1-aminomutase	ABSENT	ABSENT	ABSENT	ABSENT	ABSENT	ABSENT	ABSENT
	ALAS	5-aminolevulinate synthase	PF3D7_1246100	Sato et al., 2004, Protist	NO	TGME49_258690		ABSENT	ABSENT
	HemB (ALAD, PBGS)	5-aminolevulinate dehydratase, porphobilinogen synthase	PF3D7_1440300	Sato et al., 2004, Protist	YES	TGME49_253900	Shanmugam et al., 2010, J Biol Chem	BMR1_02g02930-t32_1-p1
	HemC (HMBS, PBGD)	Porphobilinogen deaminase, hydroxymethylbilane synthase	PF3D7_1209600	Sato et al., 2004, Protist	YES	TGME49_271420		ABSENT	ABSENT
	HemD (UROS)	Uroporphyrinogen-III synthase	ABSENT	ABSENT	ABSENT	TGME49_264200		ABSENT	ABSENT
	HemE (UROD)	Uroporphyrinogen decarboxylase	PF3D7_0607300	Nagaraj et al., 2009, Int J Parasitol	YES	TGME49_289940		ABSENT	ABSENT
	HemF (CPO)	Coproporphyrinogen III oxidase	PF3D7_1142400	Nagaraj et al., 2010, Parasitol Int	NO	TGME49_223020		ABSENT	ABSENT
	HemY (PPO)	Protoporphyrinogen oxidase	PF3D7_1028100	Nagaraj et al., 2010, Mol Biochem Parasitol	NO	TGME49_272490		ABSENT	ABSENT
	HemH (FeCH, FC)	Ferrochelatase	PF3D7_1364900	Varadharajan et al., 2004, Biochem J; van Dooren et al., 2006, FEMS Microbiol Rev	NO	TGME49_258650		ABSENT	ABSENT
OTHER	sDer1-1	DER1-like symbiont-derived protein 1	PF3D7_1452300	Sommer et al., 2007, Mol Biol Evol; Kalanon et al., 2009, Eukaryot Cell; Spork et al., 2009, Euk Cell	YES	TGME49_237460	Agrawal et al., 2009, J Biol Chem	ABSENT	ABSENT
	sDer1-2	DER1-like symbiont-derived protein 2	PF3D7_0314300	Spork et al., 2009, Euk Cell	YES	ABSENT	ABSENT	BmR1_04g07462
	Cpn60	60 kDa chaperonin	PF3D7_1232100	Sato and Wilson, 2004, Mol Biochem Parasitol	YES	TGME49_240600	Fellows et al., 2017, mBIo	BMR1_03g04270
	PREX	Plastid DNA replication-repair enzyme	PF3D7_1411400	Seow et al., 2005, Mol Biochem Parasitol	YES	TGME49_261850		BMR1_02g01235
	IscS (Nfs1)	Cysteine desulfurase IscS	PF3D7_0727200	Gisselberg et al., 2013, PLOS Pathogens	NO	TGME49_211090		BMR1_03g04230
	ELO	ER elongases	PF3D7_0920000; PF3D7_0605900; PF3D7_0109300		NO	TGME49_253880; TGME49_242380; TGME49_205350	Ramakrishnan et al., 2012, J Biol Chem	ABSENT	ABSENT
	FAS-I: ER	Fatty acid synthase type I: Enoyl reductase subunit	ABSENT	ABSENT	ABSENT	TGME49_294820		ABSENT	ABSENT
Notes:
*1 localized to the apicoplast in Plasmodium vivax
*2 localized to the apicoplast in Plasmodium berghei
*3 localized to the apicoplast in Plasmodium yoelli
*4 localization referenced as unpublished data
*5 localized to the apicoplast in Babesia bovis
