# Supplementary material for: Apicomplexan-like parasites are polyphyletic and widely but selectively dependent on cryptic plastid organelles
Source: eLife. 2019 Aug 16;8:e49662. doi: 10.7554/eLife.49662 (PMC6733595; doi:10.7554/eLife.49662)
Supplement: Supplementary file 5. [file elife-49662-supp5.xlsx]

## Sheet: Sheet1
Table S5: Prediction statistics for signal (SignalP v4.1: noTM, Dmaxcut=0.45) and transit peptides (ChloroP v1.1)
Gene	Organism	Protein / contig ID*	Met*1	SP length	D score	cTP?	cTP score
ACC	Plasmodium falciparum 3D7	PF3D7_1469600.1-p1		18	0.701	-	0.427
ACC	Rhytidocystis sp. 1	DN14543_c4_g1_i2__6806-159	2M	37	0.712	Y	0.549
ACC	Rhytidocystis sp. 2	DN4724_c9_g1_i1__166-7092		30	0.602	Y	0.537
ACC	Siedleckia nematoides WS1	DN24628_c3_g1_i1__1-1212		27	0.752	Y	0.51
ACC	Vitrella brassicaformis CCMP3155	Vbra_15163.t1-p1		19	0.65	Y	0.517
ACP	Alphamonas edax BE-2	GDKI01019969.1__679-236	2M	19	0.895	-	0.459
ACP	Chromera velia CCMP2878	Cvel_32060.t1-p1		18	0.866	-	0.453
ACP	Digyalum oweni WS1+2	DN32763_c4_g1_i2__3-413		19	0.783	-	0.431
ACP	Digyalum oweni WS3	DN12885_c4_g3_i5__803-444		19	0.774	-	0.428
ACP	Eleutheroschizon duboscqi	DN23684_c1_g6_i1__85-747		28	0.831	Y	0.582
ACP	Plasmodium falciparum 3D7	PF3D7_0208500.1-p1		21	0.859	-	0.483
ACP	Rhytidocystis sp. 1	DN11975_c0_g1_i2__2-622		21	0.882	Y	0.572
ACP	Rhytidocystis sp. 1	DN13895_c8_g1_i1__16-609		24	0.92	Y	0.575
ACP	Selenidium pygospionis	DN12973_c7_g1_i1__893-453		21	0.671	Y	0.564
ACP	Siedleckia nematoides WS1	DN18727_c0_g1_i2__1-432		20	0.694	-	0.452
ACP	Siedleckia nematoides WS2	DN41559_c0_g1_i7__6757-6323		20	0.694	-	0.452
ACP	Toxoplasma gondii ME49	TGME49_264080-t26_1-p1		21	0.772	Y	0.566
ACP	Vitrella brassicaformis CCMP3155	Vbra_4440.t1-p1		22	0.918	-	0.464
ACPS	Chromera velia CCMP2878	Cvel_11157.t1-p1		22	0.755	-	0.438
ACPS	Selenidium pygospionis	DN14703_c0_g1_i1__3946-1304		26	0.875	Y	0.513
ACPS	Toxoplasma gondii ME49	TGME49_203420-t26_1-p1		23	0.637	Y	0.584
Cpn60	Babesia microti RI	BMR1_03g04270-t32_1-p1		18	0.617	-	0.499
Cpn60	Chromera velia CCMP2878	Cvel_27132.t1-p1		23	0.611	-	0.472
Cpn60	Digyalum oweni WS1	DN30360_c8_g2_i1__3699-5621		18	0.865	-	0.485
Cpn60	Digyalum oweni WS3	DN13730_c1_g1_i1__910-2832		18	0.865	-	0.485
Cpn60	Eleutheroschizon duboscqi	DN21152_c0_g1_i1__3507-1294	3M	22	0.671	Y	0.567
Cpn60	Plasmodium falciparum 3D7	PF3D7_1232100.1-p1		23	0.87	-	0.447
Cpn60	Rhytidocystis sp. 1	DN15015_c2_g1_i1__2-2179		19	0.788	Y	0.568
Cpn60	Rhytidocystis sp. 1	DN16261_c11_g5_i1__181-2370		22	0.687	Y	0.573
Cpn60	Siedleckia nematoides WS2	DN44067_c1_g1_i1__3506-1059	2M	19	0.694	-	0.491
DXS	Babesia microti RI	BMR1_03g00540-t32_1-p1		21	0.858	-	0.441
DXS	Chromera velia CCMP2878	Cvel_25694.t1-p1		16	0.509	Y	0.509
DXS	Colpodella angusta BE-6	GDKJ01040218.1__2269-140	0	21	0.631	-	0.432
DXS	Digyalum oweni WS1	DN21135_c0_g1_i1__24-2189		18	0.689	-	0.488
DXS	Digyalum oweni WS3	DN10910_c0_g1_i1__3630-1465		18	0.689	-	0.488
DXS	Symbiont X ex Scoloplos	DN33543_c6_g2_i2__67-2238		19	0.735	-	0.486
DXS	Plasmodium falciparum 3D7	PF3D7_1337200.1-p1		23	0.676	-	0.441
DXS	Rhytidocystis sp. 1	DN14984_c6_g3_i1__2239-2	2M	21	0.773	Y	0.572
DXS	Vitrella brassicaformis CCMP3155	Vbra_18873.t1-p1		19	0.867	Y	0.567
FabB/F	Alphamonas edax BE-2	GDKI01044344.1__2-1570		23	0.813	-	0.438
FabB/F	Chromera velia CCMP2878	Cvel_3910.t1-p1		19	0.585	-	0.461
FabB/F	Eleutheroschizon duboscqi	DN22650_c5_g1_i3__2757-1213	2M	29	0.686	Y	0.552
FabB/F	Plasmodium falciparum 3D7	PF3D7_0626300.1-p1		19	0.681	-	0.467
FabB/F	Selenidium pygospionis	DN12527_c0_g3_i1__22-1521		18	0.845	Y	0.545
FabB/F	Toxoplasma gondii ME49	TGME49_293590-t26_1-p1		30	0.575	Y	0.593
FabB/F	Vitrella brassicaformis CCMP3155	Vbra_22540.t1-p1		33	0.562	Y	0.551
FabD	Chromera velia CCMP2878	Cvel_4616.t1-p1		19	0.853	-	0.485
FabD	Eleutheroschizon duboscqi	DN22317_c0_g1_i1__2-1180	0	25	0.675	Y	0.506
FabD	Plasmodium falciparum 3D7	PF3D7_1312000.1-p1	2M	33	0.663	-	0.43
FabD	Rhytidocystis sp. 1	DN14865_c4_g1_i1__163-1383		31	0.504	Y	0.582
FabD	Rhytidocystis sp. 2	DN4559_c2_g1_i1__2381-417	2M	19	0.883	-	0.481
FabD	Selenidium pygospionis	DN16037_c1_g1_i11__2899-3477		21	0.686	-	0.49
FabD	Selenidium pygospionis	DN16037_c1_g1_i6__2769-3962		25	0.681	-	0.5
FabD	Siedleckia nematoides WS1	DN26721_c4_g1_i2__3-1223		21	0.701	Y	0.522
FabD	Siedleckia nematoides WS1	DN26721_c4_g1_i4__3-1082		21	0.701	Y	0.522
FabD	Siedleckia nematoides WS2	DN32612_c0_g1_i1__1438-176		21	0.701	Y	0.522
FabD	Toxoplasma gondii ME49	TGME49_225990-t26_1-p1		17	0.77	Y	0.582
FabD	Vitrella brassicaformis CCMP3155	Vbra_21812.t1-p1		20	0.671	Y	0.513
FabG	Alphamonas edax BE-2	GDKI01019349.1__1248-259	2M	24	0.9	-	0.456
FabG	Chromera velia CCMP2878	Cvel_3619.t1-p1		18	0.878	-	0.493
FabG	Eleutheroschizon duboscqi	DN23309_c0_g1_i1__2-1144		20	0.932	Y	0.569
FabG	Plasmodium falciparum 3D7	PF3D7_0922900.1-p1		20	0.773	-	0.436
FabG	Rhytidocystis sp. 1	DN14490_c0_g1_i1__31-1065	2M	23	0.791	Y	0.518
FabG	Rhytidocystis sp. 1	DN14490_c0_g3_i1__2-1015	2M	23	0.83	Y	0.518
FabG	Rhytidocystis sp. 1	DN14490_c0_g2_i3__2-1063		23	0.745	Y	0.541
FabG	Selenidium pygospionis	DN14262_c0_g1_i1__3492-2509		23	0.719	Y	0.512
FabG	Siedleckia nematoides WS1	DN23497_c1_g1_i3__3796-2501		20	0.891	Y	0.516
FabG	Siedleckia nematoides WS2	DN40166_c2_g1_i6__46-1341		20	0.891	Y	0.516
FabG	Siedleckia nematoides WS2	DN40166_c2_g1_i7__46-1398		20	0.891	Y	0.515
FabG	Toxoplasma gondii ME49	TGME49_217740-t26_1-p1		19	0.604	Y	0.574
FabG	Vitrella brassicaformis CCMP3155	CAMPEP_0184591790		24	0.823	-	0.49
FabH	Chromera velia CCMP2878	Cvel_25041.t1-p1		21	0.769	Y	0.544
FabH	Eleutheroschizon duboscqi	DN24510_c0_g6_i4__2026-128	0	19	0.664	Y	0.553
FabH	Rhytidocystis sp. 2	DN4557_c9_g2_i2__1979-141	3M	23	0.698	Y	0.594
FabH	Selenidium pygospionis	DN13566_c1_g1_i2__56-1516		26	0.502	-	0.493
FabH	Siedleckia nematoides WS2	DN46258_c3_g3_i1__56-1708		21	0.527	Y	0.523
FabH	Vitrella brassicaformis CCMP3155	Vbra_16900.t1-p1		24	0.465	Y	0.521
FabI	Chromera velia CCMP2878	Cvel_5563.t1-p1		19	0.818	Y	0.507
FabI	Digyalum oweni WS1+2	DN30539_c0_g1_i9__1768-809		22	0.911	-	0.453
FabI	Lankesteria abbottii	CAMPEP_0113845464		20	0.706	Y	0.527
FabI	Plasmodium falciparum 3D7	PF3D7_0615100.1-p1		18	0.835	-	0.438
FabI	Rhytidocystis sp. 1	DN1997_c0_g1_i2__1412-183		24	0.86	Y	0.534
FabI	Rhytidocystis sp. 2	DN3574_c0_g1_i2__121-1416	2M	19	0.671	Y	0.545
FabI	Selenidium pygospionis	DN13551_c6_g2_i1__1-1278		35	0.663	Y	0.581
FabI	Siedleckia nematoides WS1	DN23751_c0_g1_i1__1459-221	2M	23	0.88	Y	0.534
FabI	Siedleckia nematoides WS1	DN23751_c0_g1_i2__1439-195	2M	24	0.915	Y	0.533
FabI	Siedleckia nematoides WS2	DN40548_c2_g1_i10__1578-337	2M	23	0.88	Y	0.53
FabI	Toxoplasma gondii ME49	TGME49_251930-t26_1-p1		24	0.754	Y	0.588
FabI	Vitrella brassicaformis CCMP3155	Vbra_17827.t1-p1		25	0.815	Y	0.534
FabZ	Alphamonas edax BE-2	GDKI01022325.1__2-448		20	0.879	-	0.433
FabZ	Chromera velia CCMP2878	Cvel_14912.t1-p1		17	0.894	-	0.449
FabZ	Eleutheroschizon duboscqi	DN24252_c0_g1_i1__9217-10038		26	0.753	-	0.49
FabZ	Plasmodium falciparum 3D7	PF3D7_1323000.1-p1		29	0.524	-	0.431
FabZ	Rhytidocystis sp. 1	DN12723_c0_g1_i3__10-774		19	0.617	Y	0.549
FabZ	Rhytidocystis sp. 2	DN3761_c0_g1_i1__331-1245	2M	20	0.856	Y	0.57
FabZ	Selenidium pygospionis	DN16227_c2_g2_i2__950-192		20	0.837	Y	0.552
FabZ	Siedleckia nematoides WS1	DN23202_c0_g3_i1__41-736		26	0.489	-	0.485
FabZ	Siedleckia nematoides WS1	DN23202_c0_g3_i2__124-825		27	0.466	-	0.492
FabZ	Toxoplasma gondii ME49	TGME49_321570-t26_1-p1		33	0.486	Y	0.535
FabZ	Vitrella brassicaformis CCMP3155	Vbra_19455.t1-p1		22	0.704	Y	0.516
Fdx	Babesia microti RI	BMR1_01G03290-t32_1-p1		16	0.853	-	0.462
Fdx	Chromera velia CCMP2878	Cvel_10809.t1-p1		15	0.751	-	0.473
Fdx	Colpodella angusta BE-6	GDKJ01048188.1__3-476		15	0.697	-	0.429
Fdx	Digyalum oweni WS1	DN30273_c0_g1_i3__1518-1042		18	0.717	-	0.491
Fdx	Digyalum oweni WS3	DN12682_c0_g1_i3__2714-3190		18	0.691	-	0.497
Fdx	Symbiont X ex Scoloplos	DN36896_c1_g10_i1__3-458		13	0.483	-	0.432
Fdx	Plasmodium falciparum 3D7	PF3D7_1318100.1-p1		31	0.661	Y	0.527
Fdx	Rhytidocystis sp. 1	DN13302_c1_g3_i2__6-614		18	0.857	Y	0.579
Fdx	Rhytidocystis sp. 1	DN13302_c1_g2_i1__1341-1922		25	0.775	Y	0.595
Fdx	Rhytidocystis sp. 1	DN13302_c1_g7_i1__320-889		26	0.778	Y	0.577
Fdx	Rhytidocystis sp. 2	DN4102_c0_g1_i1__5060-5899		24	0.465	Y	0.567
Fdx	Selenidium pygospionis	DN12675_c0_g1_i1__585-88		22	0.59	-	0.475
Fdx	Siedleckia nematoides WS1	DN20326_c0_g1_i1__1-804		20	0.549	-	0.483
Fdx	Siedleckia nematoides WS2	DN65002_c0_g1_i1__93-905		20	0.549	-	0.483
Fdx	Toxoplasma gondii ME49	TGME49_215070-t26_1-p1		28	0.769	Y	0.583
Fdx	Vitrella brassicaformis CCMP3155	Vbra_16079.t1-p1		17	0.814	-	0.452
Fdx	Vitrella brassicaformis CCMP3155	Vbra_17116.t1-p1		17	0.818	-	0.462
Fdx	Voromonas pontica G-3	GDKH01017325.1__293-769		17	0.858	-	0.487
FNR	Babesia microti RI	BmR1_04g09200-t32_1-p1		25	0.778	-	0.447
FNR	Digyalum oweni WS1	DN28634_c0_g1_i2__32-1018		18	0.836	-	0.431
FNR	Digyalum oweni WS3	DN11394_c0_g1_i2__27-1013		18	0.884	-	0.432
FNR	Symbiont X ex Scoloplos	DN32358_c2_g2_i1__2-1063		22	0.49	-	0.439
FNR	Plasmodium falciparum 3D7	PF3D7_0623200.1-p1		20	0.737	-	0.469
FNR	Rhytidocystis sp. 1	DN13380_c0_g2_i2__1736-285		25	0.625	Y	0.513
FNR	Rhytidocystis sp. 1	DN13380_c0_g1_i1__1758-247		26	0.714	Y	0.578
FNR	Rhytidocystis sp. 2	DN4770_c3_g5_i2__59-1627	2M	26	0.687	Y	0.538
FNR	Toxoplasma gondii ME49	TGME49_298990-t26_1-p1		24	0.532	Y	0.524
FNR	Vitrella brassicaformis CCMP3155	Vbra_15114.t1-p1		18	0.911	-	0.447
GAPDH-II	Chromera velia CCMP2878	Cvel_5775.t1-p1		19	0.669	Y	0.504
GAPDH-II	Eleutheroschizon duboscqi	DN23420_c4_g1_i3__688-3255		31	0.777	-	0.439
GAPDH-II	Rhytidocystis sp. 1	DN13617_c10_g1_i1__2-1978		18	0.827	-	0.479
GAPDH-II	Rhytidocystis sp. 2	DN2699_c0_g1_i2__1886-324		18	0.876	-	0.423
GAPDH-II	Selenidium pygospionis	DN16285_c6_g1_i3__2117-3490		20	0.803	Y	0.579
GAPDH-II	Siedleckia nematoides WS1	DN26642_c1_g1_i2__2-2209		29	0.664	-	0.426
GAPDH-II	Siedleckia nematoides WS1	DN26642_c1_g1_i4__2-2209		29	0.664	-	0.426
GAPDH-II	Siedleckia nematoides WS2	DN39638_c3_g2_i1__1-2184		29	0.663	-	0.426
GAPDH-II	Vitrella brassicaformis CCMP3155	Vbra_15241.t1-p1		17	0.76	-	0.432
HemB	Babesia microti RI	BMR1_02g02930-t32_1-p1	2M	22	0.653	Y	0.528
HemB	Chromera velia CCMP2878	Cvel_108.t1-p1		15	0.554	Y	0.514
HemB	Colpodella angusta BE-6	GDKJ01016095.1__1431-172		19	0.653	-	0.426
HemB	Digyalum oweni WS1+2	DN31051_c0_g1_i3__8-1144		14	0.619	-	0.451
HemB	Digyalum oweni WS3	DN13019_c0_g1_i8__8-1129		14	0.616	-	0.451
HemB	Plasmodium falciparum 3D7	PF3D7_1440300.1-p1		26	0.907	Y	0.525
HemB	Rhytidocystis sp. 2	DN3920_c0_g1_i2__165-2063		26	0.692	-	0.451
HemB	Siedleckia nematoides WS1	DN27898_c5_g1_i1__3-2111	3M	30	0.707	Y	0.569
HemB	Toxoplasma gondii ME49	TGME49_253900-t26_1-p1		19	0.666	Y	0.562
HemB	Vitrella brassicaformis CCMP3155	Vbra_4124.t1-p1		21	0.692	-	0.469
HemB	Voromonas pontica ATCC50640	comp4582_c0_seq1__372-1		17	0.697	-	0.468
HemC	Chromera velia CCMP2878	Cvel_26028.t1-p1		18	0.852	Y	0.501
HemC	Colpodella angusta BE-6	GDKJ01015462.1__1-1125		21	0.81	-	0.433
HemC	Digyalum oweni WS1	DN31642_c4_g3_i1__3809-4888	2M	17	0.769	-	0.436
HemC	Digyalum oweni WS3	DN12656_c4_g2_i1__1000-2	2M	17	0.865	-	0.435
HemC	Plasmodium falciparum 3D7	PF3D7_1209600.1-p1		18	0.773	-	0.434
HemC	Siedleckia nematoides WS1	DN24987_c0_g1_i4__1937-561		21	0.661	Y	0.564
HemC	Siedleckia nematoides WS2	DN41402_c3_g2_i1__1586-36		21	0.661	-	0.497
HemC	Siedleckia nematoides WS2	DN30941_c0_g1_i2__256-1428		28	0.683	Y	0.564
HemC	Toxoplasma gondii ME49	TGME49_271420-t26_1-p1		18	0.918	Y	0.547
HemC	Vitrella brassicaformis CCMP3155	Vbra_10189.t1-p1		23	0.88	Y	0.503
HemD	Chromera velia CCMP2878	Cvel_15018.t1-p1		17	0.479	-	0.47
HemD	Digyalum oweni WS1	DN31705_c5_g1_i15__6254-5583 *2		19	0.776	-	0.441
HemD	Digyalum oweni WS3	DN13327_c1_g2_i6__5559-4882	2M	19	0.778	-	0.432
HemD	Vitrella brassicaformis CCMP3155	AEN75261		28	0.463	Y	0.577
HemE	Chromera velia CCMP2878	Cvel_14720.t1-p1		22	0.778	Y	0.553
HemE	Chromera velia CCMP2878	Cvel_5098.t1-p1		23	0.491	-	0.49
HemE	Colpodella angusta BE-6	GDKJ01009462.1__1650-67		22	0.537	-	0.464
HemE	Digyalum oweni WS1	DN30312_c0_g2_i4__3-1304	2M	26	0.612	-	0.432
HemE	Digyalum oweni WS3	DN10782_c0_g1_i3__2-1300	2M	26	0.606	-	0.431
HemE	Eleutheroschizon duboscqi	DN22191_c0_g1_i4__1718-321		23	0.893	Y	0.571
HemE	Plasmodium falciparum 3D7	PF3D7_0607300.1-p1		34	0.687	-	0.431
HemE	Rhytidocystis sp. 1	DN15978_c5_g1_i2__62-1744		22	0.677	Y	0.572
HemE	Rhytidocystis sp. 1	DN15978_c7_g1_i1__4881-3394		22	0.807	Y	0.574
HemE	Selenidium pygospionis	DN15188_c0_g1_i1__1937-162		27	0.625	Y	0.584
HemE	Selenidium pygospionis	DN15188_c0_g1_i2__1898-162		27	0.648	Y	0.573
HemE	Toxoplasma gondii ME49	TGME49_289940-t26_1-p1		26	0.61	-	0.451
HemE	Vitrella brassicaformis CCMP3155	Vbra_4036.t1-p1		19	0.797	Y	0.568
HemF	Chromera velia CCMP2878	Cvel_21486.t1-p1		18	0.738	-	0.451
HemF	Chromera velia CCMP2878	Cvel_2641.t1-p1		23	0.696	Y	0.539
HemF	Colpodella angusta BE-6	GDKJ01040013.1__1611-262		19	0.757	-	0.43
HemF	Rhytidocystis sp. 1	DN16369_c3_g1_i1__2137-2		32	0.543	Y	0.559
HemF	Selenidium pygospionis	DN14055_c0_g1_i2__62-973		22	0.742	-	0.49
HemF	Selenidium pygospionis	DN14055_c0_g1_i3__62-973		22	0.783	-	0.48
HemF	Vitrella brassicaformis CCMP3155	Vbra_3027.t1-p1		19	0.832	Y	0.52
HemF	Vitrella brassicaformis CCMP3155	Vbra_16068.t1-p1		23	0.82	Y	0.506
HemG/Y	Chromera velia CCMP2878	Cvel_13840.t1-p1		19	0.581	Y	0.524
HemG/Y	Colpodella angusta BE-6	GDKJ01029069.1__1-1764		25	0.696	-	0.464
HemG/Y	Rhytidocystis sp. 1	DN15321_c5_g1_i1__2021-132		33	0.658	Y	0.553
HemG/Y	Rhytidocystis sp. 2	DN4462_c5_g1_i1__2122-308	2M	28	0.833	Y	0.563
HemG/Y	Selenidium pygospionis	DN15791_c2_g1_i10__107-2536	2M	22	0.562	-	0.435
HemG/Y	Siedleckia nematoides WS2	DN47410_c2_g1_i1__3-1295		26	0.675	-	0.485
HemG/Y	Vitrella brassicaformis CCMP3155	Vbra_17795.t1-p1		20	0.656	-	0.471
HemH	Chromera velia CCMP2878	CAMPEP_0184611348		33	0.794	-	0.488
HemH	Chromera velia CCMP2878	Cvel_18167.t1-p1		32	0.679	-	0.463
HemH	Colpodella angusta BE-6	GDKJ01015722.1__1312-44		17	0.726	-	0.478
HemH	Eleutheroschizon duboscqi	DN23454_c1_g8_i4__2581-503		33	0.703	-	0.473
HemH	Rhytidocystis sp. 1	DN15472_c5_g2_i3__5940-4255		29	0.634	-	0.467
HemH	Rhytidocystis sp. 2	DN4970_c0_g2_i3__266-2485	2M	28	0.705	-	0.446
HemH	Vitrella brassicaformis CCMP3155	CAMPEP_0184583824		19	0.467	-	0.476
HemH	Vitrella brassicaformis CCMP3155	Vbra_10627.t1-p1		33	0.587	-	0.438
IspC	Babesia microti RI	BMR1_02g02665-t32_1-p1		17	0.532	-	0.461
IspC	Chromera velia CCMP2878	Cvel_5503.t1-p1		16	0.816	Y	0.502
IspC	Colpodella angusta BE-6	GDKJ01057860.1__1-1431	2M	20	0.798	-	0.448
IspC	Digyalum oweni WS1	DN31900_c4_g2_i1__2115-931 *3		18	0.769	Y	0.531
IspC	Digyalum oweni WS3	DN13564_c2_g1_i1__52-1476		18	0.83	Y	0.529
IspC	Rhytidocystis sp. 1	DN15331_c0_g2_i1__1796-267		15	0.705	Y	0.579
IspC	Rhytidocystis sp. 2	DN4099_c0_g2_i2__3991-5862	6M	25	0.719	Y	0.51
IspC	Selenidium pygospionis	DN14557_c3_g1_i11__1181-3		25	0.624	Y	0.542
IspC	Toxoplasma gondii ME49	TGME49_214850-t26_1-p1		25	0.69	Y	0.576
IspC	Vitrella brassicaformis CCMP3155	Vbra_11326.t1-p1	1M	30	0.708	Y	0.517
IspD	Babesia microti RI	BMR1_01G02480-t32_1-p1		28	0.553	-	0.456
IspD	Chromera velia CCMP2878	Cvel_20751.t1-p1		19	0.818	Y	0.563
IspD	Colpodella angusta BE-6	GDKJ01026396.1__954-1730	1M	18	0.917	-	0.433
IspD	Digyalum oweni WS1	DN31182_c2_g2_i1__65-763		15	0.707	-	0.43
IspD	Digyalum oweni WS3	DN12772_c3_g1_i2__42-458		15	0.707	-	0.43
IspD	Plasmodium falciparum 3D7	PF3D7_0106900.1-p1		20	0.685	-	0.446
IspD	Rhytidocystis sp. 2	DN3842_c0_g1_i1__2852-4360	8M	22	0.846	Y	0.506
IspD	Siedleckia nematoides WS2	DN42939_c0_g1_i5__2-1126		18	0.704	-	0.483
IspD	Toxoplasma gondii ME49	TGME49_306260-t26_1-p1		59	0.583	-	0.494
IspD	Vitrella brassicaformis CCMP3155	Vbra_22684.t1-p1		16	0.711	Y	0.535
IspE	Babesia microti RI	BMR1_03g01890-t32_1-p1		21	0.471	-	0.439
IspE	Chromera velia CCMP2878	Cvel_10215.t1-p1		18	0.796	Y	0.55
IspE	Colpodella angusta BE-6	GDKJ01030155.1__22-1104		16	0.72	-	0.431
IspE	Digyalum oweni WS1	DN30601_c1_g4_i1__2679-1657		18	0.722	-	0.443
IspE	Digyalum oweni WS3	DN11712_c4_g1_i2__2807-1785		18	0.722	-	0.443
IspE	Eleutheroschizon duboscqi	DN18812_c0_g1_i2__960-3032		24	0.544	Y	0.566
IspE	Plasmodium falciparum 3D7	PF3D7_0503100.1-p1		39	0.559	-	0.444
IspE	Rhytidocystis sp. 1	DN6751_c0_g2_i1__831-1		21	0.845	Y	0.569
IspE	Rhytidocystis sp. 1	DN10668_c0_g2_i1__724-2		31	0.824	Y	0.571
IspE	Siedleckia nematoides WS1	DN26966_c0_g1_i1__7-801		25	0.68	Y	0.515
IspE	Siedleckia nematoides WS2	DN36362_c4_g1_i1__574-2		25	0.68	Y	0.515
IspE	Toxoplasma gondii ME49	TGME49_306550-t26_1-p1		22	0.645	-	0.484
IspE	Voromonas pontica ATCC50640	comp26767_c0_seq1__19-549		20	0.885	-	0.47
IspF	Babesia microti RI	BmR1_04g05000-t32_1-p1		35	0.685	-	0.437
IspF	Chromera velia CCMP2878	Cvel_25386.t1-p1		26	0.736	-	0.455
IspF	Colpodella angusta BE-6	GDKJ01042803.1__1-375		17	0.745	-	0.427
IspF	Digyalum oweni WS1	DN31366_c1_g2_i1__2887-2297		30	0.646	-	0.431
IspF	Digyalum oweni WS3	DN13875_c0_g1_i1__64-498		32	0.694	-	0.431
IspF	Eleutheroschizon duboscqi	DN22784_c4_g1_i1__1391-264		20	0.648	Y	0.516
IspF	Plasmodium falciparum 3D7	PF3D7_0209300.1-p1		21	0.455	-	0.432
IspF	Rhytidocystis sp. 1	DN15230_c4_g1_i1__1489-440		25	0.57	Y	0.585
IspF	Rhytidocystis sp. 1	DN15230_c4_g1_i2__1424-378		25	0.57	Y	0.585
IspF	Rhytidocystis sp. 2	DN4266_c9_g2_i1__486-1508		20	0.633	Y	0.508
IspF	Siedleckia nematoides WS1	DN23983_c0_g2_i2__160-1023	2M	22	0.874	-	0.445
IspF	Siedleckia nematoides WS2	DN49920_c19_g1_i1__3551-2679	2M	22	0.848	-	0.446
IspF	Toxoplasma gondii ME49	TGME49_255690-t26_1-p1		22	0.691	Y	0.573
IspG	Babesia microti RI	BMR1_03g01825-t32_1-p1		26	0.891	-	0.479
IspG	Chromera velia CCMP2878	Cvel_23671.t1-p1		19	0.566	-	0.463
IspG	Digyalum oweni WS1	DN31151_c4_g2_i1__2354-111		22	0.781	-	0.438
IspG	Digyalum oweni WS3	DN11747_c3_g1_i1__66-2312		22	0.779	-	0.441
IspG	Symbiont X ex Scoloplos	DN32775_c5_g1_i21__1418-3		22	0.465	-	0.432
IspG	Plasmodium falciparum 3D7	PF3D7_1022800.1-p1		20	0.948	-	0.45
IspG	Rhytidocystis sp. 1	DN15639_c0_g2_i1__2928-421		21	0.626	Y	0.559
IspG	Rhytidocystis sp. 1	DN14870_c5_g5_i1__1291-2		36	0.454	Y	0.568
IspG	Rhytidocystis sp. 2	DN4533_c7_g1_i1__2488-140		33	0.845	-	0.479
IspG	Selenidium pygospionis	DN15457_c0_g1_i2__33-2366		25	0.655	-	0.466
IspG	Siedleckia nematoides WS2	DN33207_c0_g1_i1__1-2226		19	0.783	-	0.477
IspG	Vitrella brassicaformis CCMP3155	Vbra_4867.t1-p1		18	0.725	-	0.46
IspH	Babesia microti RI	BmR1_04g05255-t32_1-p1		31	0.592	-	0.454
IspH	Chromera velia CCMP2878	Cvel_2579.t1-p1		19	0.708	-	0.476
IspH	Colpodella angusta BE-6	GDKJ01006017.1__1236-52		18	0.781	-	0.433
IspH	Digyalum oweni WS1	DN31490_c2_g4_i1__4930-2768		18	0.735	-	0.436
IspH	Plasmodium falciparum 3D7	PF3D7_0104400.1-p1		22	0.455	-	0.424
IspH	Selenidium pygospionis	DN13979_c0_g1_i1__2875-503		21	0.745	Y	0.519
IspH	Siedleckia nematoides WS1	DN28200_c0_g2_i4__1883-372		35	0.617	Y	0.543
LipA	Alphamonas edax BE-2	GDKI01035397.1__3-515	2M	22	0.911	-	0.454
LipA	Chromera velia CCMP2878	Cvel_3285.t1-p1		15	0.561	Y	0.528
LipA	Digyalum oweni WS1	DN27767_c0_g1_i1__14-1090		17	0.506	-	0.444
LipA	Digyalum oweni WS3	DN12239_c1_g1_i3__2-454		15	0.507	-	0.45
LipA	Eleutheroschizon duboscqi	DN22942_c0_g1_i1__483-2027	3M	22	0.601	Y	0.558
LipA	Plasmodium falciparum 3D7	PF3D7_1344600.1-p1		23	0.634	-	0.435
LipA	Rhytidocystis sp. 1	DN15029_c5_g2_i1__3-1628	3M	20	0.679	-	0.488
LipA	Selenidium pygospionis	DN16476_c6_g1_i1__1486-395		19	0.632	-	0.451
LipB	Digyalum oweni WS1	DN30532_c2_g1_i2__3411-2593		15	0.58	-	0.432
LipB	Plasmodium falciparum 3D7	PF3D7_0823600.1-p1		20	0.62	-	0.456
LipB	Rhytidocystis sp. 1	DN12946_c2_g1_i2__2741-1326		34	0.708	Y	0.558
LipB	Rhytidocystis sp. 2	DN5123_c7_g4_i1__2552-747		19	0.855	-	0.448
LipB	Selenidium pygospionis	DN16198_c3_g1_i1__2461-3294		21	0.653	Y	0.529
LipB	Siedleckia nematoides WS2	DN38863_c4_g4_i1__2339-3226		27	0.679	-	0.433
LipB	Vitrella brassicaformis CCMP3155	Vbra_11629.t1-p1		39	0.592	Y	0.504
NifU	Chromera velia CCMP2878	Cvel_13098.t1-p1		24	0.665	-	0.485
NifU	Digyalum oweni WS1	DN30812_c0_g5_i1__4344-3655		16	0.775	-	0.443
NifU	Digyalum oweni WS2	DN5445_c2_g2_i2__1039-149		23	0.692	-	0.451
NifU	Digyalum oweni WS3	DN13442_c3_g1_i1__4356-3667		16	0.762	-	0.443
NifU	Plasmodium falciparum 3D7	PF3D7_0921400.1-p1		21	0.495	-	0.479
NifU	Rhytidocystis sp. 1	DN4435_c0_g1_i1__3-992	2M	24	0.879	Y	0.511
NifU	Rhytidocystis sp. 1	DN11958_c1_g1_i1__3-941		20	0.769	-	0.497
NifU	Rhytidocystis sp. 2	DN3544_c0_g1_i1__1681-344	5M	52	0.627	Y	0.531
NifU	Siedleckia nematoides WS1	DN24499_c0_g3_i1__1116-637	2M	28	0.852	Y	0.519
NifU	Siedleckia nematoides WS2	DN45178_c4_g1_i2__47-1060	2M	28	0.852	Y	0.519
NifU	Vitrella brassicaformis CCMP3155	Vbra_18723.t1-p1		20	0.788	Y	0.533
NifU	Vitrella brassicaformis CCMP3155	Vbra_20791.t1-p1		23	0.78	Y	0.517
PDHE1a	Chromera velia CCMP2878	Cvel_18110.t1-p1		20	0.847	Y	0.559
PDHE1a	Eleutheroschizon duboscqi	DN23751_c1_g2_i3__468-2288		24	0.93	Y	0.552
PDHE1a	Plasmodium falciparum 3D7	PF3D7_1124500.1-p1		18	0.871	-	0.457
PDHE1a	Rhytidocystis sp. 1	DN15362_c3_g6_i1__314-2179	2M	18	0.605	Y	0.578
PDHE1a	Rhytidocystis sp. 1	DN15362_c3_g8_i1__1-1707	2M	19	0.705	Y	0.577
PDHE1a	Rhytidocystis sp. 2	DN4944_c3_g1_i1__2161-443	3M	30	0.673	Y	0.586
PDHE1a	Selenidium pygospionis	DN16447_c8_g1_i1__1721-132		19	0.597	Y	0.549
PDHE1b	Plasmodium falciparum 3D7	PF3D7_1446400.1-p1		21	0.514	-	0.445
PDHE1b	Rhytidocystis sp. 1	DN12843_c0_g1_i1__1767-367	4M	27	0.715	Y	0.56
PDHE1b	Rhytidocystis sp. 1	DN14232_c6_g2_i1__3-1559		16	0.536	Y	0.529
PDHE1b	Toxoplasma gondii ME49	TGME49_272290-t26_1-p1		19	0.503	Y	0.586
PDHE1b	Vitrella brassicaformis CCMP3155	Vbra_13704.t1-p1		21	0.755	-	0.45
PDHE2	Chromera velia CCMP2878	Cvel_496.t1-p1		20	0.843	Y	0.552
PDHE2	Digyalum oweni WS2	DN5635_c9_g1_i1__2-406		15	0.458	-	0.447
PDHE2	Eleutheroschizon duboscqi	DN22015_c0_g1_i2__3275-486	3M	21	0.861	-	0.495
PDHE2	Plasmodium falciparum 3D7	PF3D7_1020800.1-p1		26	0.551	Y	0.529
PDHE2	Rhytidocystis sp. 1	DN16134_c4_g1_i2__3045-64		19	0.521	Y	0.58
PDHE2	Rhytidocystis sp. 1	DN16134_c4_g1_i1__3072-64		21	0.587	Y	0.575
PDHE2	Selenidium pygospionis	DN13100_c0_g1_i5__2417-3		35	0.563	Y	0.528
PDHE2	Toxoplasma gondii ME49	TGME49_206610-t26_1-p1		17	0.617	Y	0.594
PDHE2	Vitrella brassicaformis CCMP3155	Vbra_20387.t1-p1		21	0.842	Y	0.522
PDHE3	Alphamonas edax BE-2	GDKI01017460.1__1-1530		22	0.655	-	0.435
PDHE3	Plasmodium falciparum 3D7	PF3D7_0815900.1-p1	2M	48	0.506	-	0.434
PDHE3	Rhytidocystis sp. 1	DN15344_c2_g1_i2__2141-168	2M	25	0.628	Y	0.566
PDHE3	Rhytidocystis sp. 1	DN15344_c2_g1_i1__2331-349		24	0.8	Y	0.582
PDHE3	Selenidium pygospionis	DN14409_c2_g2_i1__2032-194	2M	23	0.778	Y	0.522
PDHE3	Siedleckia nematoides WS1	DN28323_c2_g1_i6__563-2272		24	0.809	-	0.497
PGK-II	Chromera velia CCMP2878	Cvel_8779.t1-p1		18	0.603	-	0.434
PGK-II	Chromera velia CCMP2878	Cvel_21993.t1-p1		19	0.464	-	0.449
PGK-II	Rhytidocystis sp. 1	DN14990_c0_g1_i2__2-1540		22	0.684	Y	0.573
PGK-II	Rhytidocystis sp. 1	DN14990_c0_g1_i3__2-1546		22	0.678	Y	0.584
PGK-II	Rhytidocystis sp. 2	DN4798_c8_g2_i3__1926-439		20	0.736	Y	0.587
PGK-II	Selenidium pygospionis	DN15862_c0_g1_i2__3616-5052		17	0.786	Y	0.531
PGK-II	Siedleckia nematoides WS2	DN40687_c3_g2_i2__2149-449	2M	41	0.542	Y	0.571
PGK-II	Toxoplasma gondii ME49	TGME49_222020-t26_1-p1		18	0.538	Y	0.577
PGK-II	Vitrella brassicaformis CCMP3155	Vbra_17333.t1-p1		19	0.631	Y	0.514
PK-II	Babesia microti RI	BMR1_01G02635-t32_1-p1		19	0.552	Y	0.508
PK-II	Digyalum oweni WS1+2	DN32460_c4_g1_i2__7024-5489		18	0.576	-	0.439
PK-II	Digyalum oweni WS3	DN12950_c0_g1_i1__15-1550		18	0.597	-	0.439
PK-II	Plasmodium falciparum 3D7	PF3D7_1037100.1-p1		20	0.746	-	0.447
PK-II	Rhytidocystis sp. 1	DN15557_c1_g1_i2__1758-1	2M	28	0.671	Y	0.518
PK-II	Rhytidocystis sp. 1	DN13455_c0_g2_i1__62-2197		27	0.784	Y	0.556
PK-II	Selenidium pygospionis	DN14350_c3_g1_i1__30-2009		31	0.789	Y	0.549
PK-II	Vitrella brassicaformis CCMP3155	Vbra_11555.t1-p1		25	0.859	Y	0.565
PREX	Chromera velia CCMP2878	Cvel_8733.t1-p1		25	0.68	-	0.476
PREX	Plasmodium falciparum 3D7	PF3D7_1411400.1-p1		19	0.744	-	0.447
sDer1	Babesia microti RI	BmR1_04g07462-t32_1-p1		18	0.834	-	0.491
sDer1	Chromera velia CCMP2878	Cvel_2018.t1-p1		25	0.613	-	0.492
sDer1	Chromera velia CCMP2878	Cvel_23890.t1-p1		27	0.76	-	0.497
sDer1	Digyalum oweni WS1	DN31193_c0_g2_i1__613-1443		18	0.685	-	0.431
sDer1	Digyalum oweni WS1	DN30733_c3_g1_i1__2048-1176		16	0.637	-	0.445
sDer1	Digyalum oweni WS3	DN13340_c1_g1_i1__3217-2384		18	0.659	-	0.43
sDer1	Digyalum oweni WS3	DN10830_c0_g1_i1__7-879		16	0.636	-	0.441
sDer1	Eleutheroschizon duboscqi	DN22916_c7_g1_i16__1827-277		19	0.734	Y	0.534
sDer1	Eleutheroschizon duboscqi	DN23608_c5_g1_i1__92-1588		27	0.717	-	0.48
sDer1	Plasmodium falciparum 3D7	PF3D7_1452300.1-p1_D1-1		19	0.687	-	0.441
sDer1	Plasmodium falciparum 3D7	PF3D7_0314300.1-p1_D1-2		20	0.838	-	0.463
sDer1	Rhytidocystis sp. 1	DN9495_c0_g1_i1__15-1655	2M	29	0.725	Y	0.558
sDer1	Selenidium pygospionis	DN13567_c4_g1_i2__204-1469		17	0.852	-	0.454
sDer1	Selenidium pygospionis	DN14981_c3_g1_i10__1582-3153		22	0.924	-	0.472
sDer1	Siedleckia nematoides WS1	DN27265_c5_g3_i1__294-1403		26	0.832	-	0.471
sDer1	Vitrella brassicaformis CCMP3155	Vbra_17431.t1-p1		21	0.754	Y	0.547
sDer1	Vitrella brassicaformis CCMP3155	Vbra_16574.t1-p1		17	0.87	Y	0.526
SufA	Plasmodium falciparum 3D7	PF3D7_0522700.1-p1		24	0.623	-	0.476
SufA	Rhytidocystis sp. 1	DN15525_c2_g3_i1__1228-74		21	0.749	-	0.499
SufA	Rhytidocystis sp. 1	DN15525_c2_g2_i3__1929-721		29	0.875	Y	0.535
SufA	Selenidium pygospionis	DN12608_c4_g1_i3__31-1149		19	0.786	Y	0.513
SufA	Vitrella brassicaformis CCMP3155	Vbra_585.t1-p1		18	0.707	Y	0.565
SufB	Chromera velia CCMP2878	Cvel_4495.t1-p1		18	0.703	-	0.441
SufB	Colpodella angusta BE-6	GDKJ01051769.1__2-1570		19	0.735	-	0.43
SufB	Voromonas pontica ATCC50640	comp24340_c0_seq1__233-1081		20	0.619	-	0.47
SufC	Chromera velia CCMP2878	Cvel_14.t1-p1		18	0.68	-	0.473
SufC	Colpodella angusta BE-6	GDKJ01026217.1__898-62		15	0.608	-	0.43
SufC	Digyalum oweni WS1	DN30848_c5_g1_i1__5433-4498		19	0.588	-	0.428
SufC	Digyalum oweni WS1	DN30980_c0_g3_i1__1256-243		17	0.664	-	0.437
SufC	Digyalum oweni WS3	DN13767_c3_g1_i2__6255-5242		17	0.664	-	0.437
SufC	Eleutheroschizon duboscqi	DN14633_c0_g1_i2__127-1878		21	0.705	Y	0.548
SufC	Plasmodium falciparum 3D7	PF3D7_1413500.1-p1		23	0.86	-	0.444
SufC	Rhytidocystis sp. 1	DN15024_c5_g2_i1__2779-386		21	0.774	Y	0.583
SufC	Rhytidocystis sp. 2	DN3565_c0_g1_i1__1891-149	2M	22	0.755	Y	0.542
SufC	Selenidium pygospionis	DN16373_c10_g1_i1__4988-6307		19	0.574	-	0.448
SufC	Siedleckia nematoides WS1	DN26616_c5_g1_i1__1668-3251	3M	23	0.812	-	0.442
SufC	Siedleckia nematoides WS2	DN49315_c3_g1_i3__261-1844	3M	23	0.803	-	0.442
SufC	Vitrella brassicaformis CCMP3155	Vbra_4547.t1-p1		25	0.856	-	0.47
SufD	Chromera velia CCMP2878	Cvel_17786.t1-p1		26	0.747	Y	0.515
SufD	Digyalum oweni WS1	DN31283_c10_g1_i6__2506-338		17	0.864	-	0.428
SufD	Rhytidocystis sp. 1	DN13351_c2_g1_i1__1-3186	2M	24	0.741	Y	0.522
SufD	Rhytidocystis sp. 1	DN13351_c1_g1_i1__220-3330		26	0.721	Y	0.548
SufD	Selenidium pygospionis	DN16433_c6_g1_i1__11357-9003		19	0.605	-	0.458
SufD	Siedleckia nematoides WS1	DN21969_c3_g2_i2__1156-4188		23	0.665	Y	0.507
SufE	Alphamonas edax BE-2	GDKI01002489.1__80-688		20	0.937	Y	0.539
SufE	Colpodella angusta BE-6	GDKJ01011978.1__3-503		15	0.801	-	0.445
SufE	Digyalum oweni WS1	DN31316_c3_g3_i1__5-982		19	0.587	-	0.433
SufE	Digyalum oweni WS3	DN10806_c0_g2_i1__3-977		19	0.627	-	0.433
SufE	Symbiont X ex Scoloplos	DN33422_c1_g1_i2__3-629		19	0.805	-	0.444
SufE	Plasmodium falciparum 3D7	PF3D7_0206100.1-p1		25	0.787	-	0.437
SufE	Rhytidocystis sp. 1	DN11618_c0_g1_i2__15-974		20	0.818	-	0.456
SufE	Rhytidocystis sp. 2	DN5027_c0_g2_i10__2036-3130	2M	19	0.71	-	0.451
SufE	Rhytidocystis sp. 2	DN5027_c0_g2_i2__2988-4043	2M	19	0.71	-	0.451
SufE	Selenidium pygospionis	DN15665_c0_g1_i2__4032-3094		17	0.683	Y	0.544
SufE	Siedleckia nematoides WS1	DN27613_c2_g4_i5__302-1258	2M	24	0.783	Y	0.541
SufE	Siedleckia nematoides WS1	DN27613_c2_g4_i9__303-1460	2M	24	0.833	Y	0.517
SufE	Toxoplasma gondii ME49	TGME49_277010-t26_1-p1		40	0.489	-	0.493
SufS	Babesia microti RI	BMR1_03g01415-t32_1-p1		36	0.681	-	0.436
SufS	Chromera velia CCMP2878	Cvel_2564.t1-p1		19	0.724	-	0.452
SufS	Digyalum oweni WS2	DN5634_c3_g1_i1__3-1439		16	0.76	-	0.445
SufS	Digyalum oweni WS3	DN13736_c3_g2_i1__3192-1708		16	0.644	-	0.446
SufS	Plasmodium falciparum 3D7	PF3D7_0716600.1-p1		20	0.491	-	0.433
SufS	Rhytidocystis sp. 2	DN4946_c5_g1_i1__176-1987		17	0.527	Y	0.537
SufS	Selenidium pygospionis	DN15681_c0_g1_i2__3834-2329		23	0.681	-	0.494
SufS	Siedleckia nematoides WS1	DN24222_c2_g1_i14__2727-1105		22	0.778	-	0.495
SufS	Toxoplasma gondii ME49	TGME49_216170-t26_1-p1		22	0.65	Y	0.564
SufS	Vitrella brassicaformis CCMP3155	Vbra_6995.t1-p1		32	0.716	-	0.443
TPI-II	Babesia microti RI	BmR1_04g06140-t32_1-p1		21	0.659	-	0.444
TPI-II	Chromera velia CCMP2878	Cvel_11213.t1-p1		16	0.494	-	0.455
TPI-II	Digyalum oweni WS1	DN29932_c0_g2_i2__99-983		15	0.579	-	0.461
TPI-II	Eleutheroschizon duboscqi	DN23943_c2_g2_i2__5087-3831		33	0.518	-	0.481
TPI-II	Plasmodium falciparum 3D7	PF3D7_0318800.1-p1		20	0.466	-	0.449
TPI-II	Rhytidocystis sp. 1	DN10656_c0_g1_i1__47-991		22	0.795	Y	0.542
TPI-II	Selenidium pygospionis	DN15991_c1_g1_i2__3906-2845		24	0.865	Y	0.504
TPI-II	Siedleckia nematoides WS1	DN24112_c7_g1_i1__1656-532		30	0.808	-	0.494
TPI-II	Siedleckia nematoides WS2	DN43773_c1_g5_i2__1715-501		30	0.808	-	0.456
TPI-II	Siedleckia nematoides WS2	DN21295_c0_g1_i1__127-1299		34	0.616	-	0.494
TPI-II	Toxoplasma gondii ME49	TGME49_233500-t26_1-p1		23	0.527	Y	0.534
TPI-II	Vitrella brassicaformis CCMP3155	Vbra_15673.t1-p1		23	0.831	-	0.468
TPT	Babesia microti RI	BMR1_03g01020-t32_1-p1		27	0.53	-	0.471
TPT	Chromera velia CCMP2878	Cvel_10957.t1-p1		19	0.602	Y	0.541
TPT	Plasmodium falciparum 3D7	PF3D7_0530200.1-p1		48	0.501	Y	0.52
TPT	Rhytidocystis sp. 2	DN3310_c0_g1_i1__44-2434	2M	22	0.725	Y	0.554
TPT	Rhytidocystis sp. 2	DN4580_c3_g7_i1__141-1808		19	0.865	-	0.434
TPT	Vitrella brassicaformis CCMP3155	Vbra_14545.t1-p1		20	0.87	-	0.439
Notes:
*1 = shows which methionine in the sequence carries the signal peptide (if not the first); tree sequences with strongly predicted N-terminal signal peptide no Met is present (0)
*2 = the N-terminal extension of this sequence contains an unspliced, in-frame intron with a STOP codon
*3 = sequence is frame-shifted in the N-terminal region, as verified by PCR
