# Supplementary material for: Apicomplexan-like parasites are polyphyletic and widely but selectively dependent on cryptic plastid organelles
Source: eLife. 2019 Aug 16;8:e49662. doi: 10.7554/eLife.49662 (PMC6733595; doi:10.7554/eLife.49662)
Supplement: Supplementary file 6. [file elife-49662-supp6.xlsx]

## Sheet: Sheet1
Table S6: Reference 16S rDNA sequences for apicomplexan related lineages (ARLs), Digyalum, and newly sequenced apicomplexans
Lineage	Species or environmental clone	Source	Divergent sequence ends trimmed	Sequence
ARL-I	Vitrella brassicaformis CCMP3155	NC_014345.1		CGAGTTTGATCCTGGCTCAGGATGAACGCGAGTCGGCGTGCCTAACACATGCAAGTCGTATGGGGCTTCGGCCCCATGGCGTACGGGTGAGTAACACGTGGGCACCTGCCCCCAGATACGGGTATAATGGAGGGAAACCTTCGGTAATCCCCTATAGGCGCAGGAAGTGCTTTGGAAAGTTCTAGCTGCTAGCTAGAGTGTCTGGGGATGGGCCTGCGGCTGATTAGCTAGTTGGTGCGGGTAATGGCCTACCAAGGCGAGGATCAGTAGCTGGCCTGAGAGGGCGGCCGGCCACATTGGGACTGAGACACGGCCCAGACTCCTACGGGAGGCAGCAGTGGGGAATCTTCTGCAATGGGCGCAAGCCTGACAGTGCGACGCCGCGTGAAGGAAGAAGGC…
ARL-II	FRSSCY_03B	EU019423.1		TGGGTTGTAAACCCCTTTTCTCGAGGGATGAAGACTGACCACTCGATTAAGAAAGCATCGGCTAACTCCGTGCCAGCAGCCGCGGTAATACGGGGGATGCGAGCGTTATCCGGAATCACTGGGCGTAAAGCGTCTGTAGGTGGTTCGGTGTGCCCACTGTGAAACCACGGGGACCAACCCCGTGAAAGTGGTGGAGACTACCGAACTCGAGGGCGGTAGGGGCTGGGGTAATCCCTTGAGTAGTGGTGAAATACTCTGATACAAGGGGGAAGTCCTGACGCGAAGGCACCCTGCTGGGCCGTTCCTGACACTGAGAGACGAAAGCTAGGGGAGCAAAAGGGATTAGATACCCCTGTAGTCA
ARL-III	Chromera velia CCMP2878	NC_014340.2		AGAGTTTGATCCTGGCTCAGGGTGAACGCGAATCAGCGCACTTAACACATGCAAGTTTTATGGATAGCTTTGAGCCTAGCTTTTAGTTAGACATAGCGAACGGGTGCGTAATGCTTAAGAATCTACTTTTAACTAAGGGATAATGGAAGGAAACTTTTGCTAATTCCTTATAGGTATGGATAAGATAACCTATCTTCATCTTGTTTAGAAAAAATTTGGCTGCTCAACGTAGTTAAGTTGGTTAAAAAAGAGCTTGAATCTGATTAGTTAGTAGGTGAGGTAAAGGCTTACCTAGACGATAATCGGTAGCGGATCTGAGAGGATGACCCGCCACATTGGGACTGAGACACGGCCCAAACTTCTACGGAAGGCAGCAGTGAGGAATATTCTGCAATGGGC…
ARL-IV	V1B07b228	HQ153908.1	yes	TTTTCATGGCGAACGGGTGAGTAAAACGTGAGAATTTACACCTAGGCCAGGGATAACAAAGGGAAACCTTTGGTAATATCTGATACGCGCAAAAAAGTGCTTTAAAAAGTTATTACTGCCTAGAATCGAGCTCATGGCTGATTAGCTAGTTGGTGGAGTAATAGCCTACCAAGGCGAGTATCAGTAGCTGTCTTGAGAGGGAGGCCAGCCACATTGGGATTTAGAAACGGCCCAAACTCCTACGGGAGGCAGCAGTGGGGAATCTTTTGCAATGGGCGCAAGCCCGACAGAGCGACGCCAAGTGAAGGATGACGGCCTTTTTGGTTGTAAACTTCTTTTACCTAATTTATTAAGACTGAGTAAAAGGTTAAAAAGTATCGGCTAACTCCGTGCCAGCAG…
ARL-V	corallicolid WK-2018	MH304845.1		CGAGTTTGATCCTGGCTCAGGATGAACGCACAAGACGTGCCTAACACATGCAAATCGAATGAAAACAATAATTATTGTTTTCATGGTGAACGGGTGAGTAATACATAAGAATCAGCTTTTAGATAAGGCATAAAAGAGTAATATCTTGGTAATTCCTTATATGCGCAGCAGTGCTTAAAAAGGGGAGTCCCGTCTAAAAACGAGCTTATGCCTGATTAGCTAGTTGGCGAGTTAAAAGCTCACCAAGGCGAAGATCAGTAGCTGGCCTGAGAGGGCGGCCAGCCACATTGGGACTGAGACACGGCCCAAACTCCTACGGGAGGCAGCAGTGGGGAATCTTCTGCAATGGGCGCAAGCCTGACAGAGCGGCGTCGTGTGAAGGAAGAAGGCCTGAAATAG…
ARL-V	CD204E04	DQ200449.1		GAGTTTGATCATGGCTCAGGATGAACGCACAAGACGTGCCTAACACATGCAAATCGAATGAAAATAATTAATTATTGTTTTCATGGTGAACGGGTGAGTAACACATAAGAATCAGCTTTTAGATAAGGCATAAAAGAGTAATATCTTGGTAATTCCTTATATGCGCAGCAGTGCTTAAAAAGGGGAGTCCCGTCTAAAAACGAGCTTATGCCTGATTAGCTAGTTGGCGAGTTAAAAGCTCACCAAGGCGAAGATCAGTAGCTGGCCTGAGAGGGCGGCCAGCCACATTGGGACTGAGACACGGCCCAAACTCCTACGGGAGGCAGCAGTGGGGAATCTTCTGCAATGGGCGCAAGCCTGACAGAGCGGCGTCGTGTGAAGGAAGAAGGCCTGAAATAG…
ARL-VI	F1D	DQ860014.1		AGAGTTTGATCCTGGCTCAGGATGAACGCACAAGACGTGCCTAACACATGCAAATCGAATGAAAATAATTAAATTGTTTTCATGGTGAACGGGTGAGTAATACATGAGAATCTACTTTTAGATAAGGCAAAATAAAAGTAATATTTTGGTAATTCCTTATATGCGCATTAGTGCTTAAAAAGGGGTGAATATTTAATCACTCCGTCTAAAAACGAGCTCATGCCTGATTAGCTAGTTGGCGAGGTAATAGCTCACCAAGGCGAAGATCAGTAGTTGGCCTGAGAGGGCGGTCAACCACATTGGGACTGAGACACGGCCCAAACTCCTACGGGAGGCAGCAGTGGGGAATCTTCTGCAATGGGCGAAAACCTGACAGAGCGGCGTCATGTGAAGGAAGAA…
ARL-VI	10-BacFinL	LC121885.1		TGAGAGACGAAAGCTAGGGGAGCGAATGGGATTAGATACCCCCAGTAGTCCTAGCTGTAAACGATGGGTACTCGTGCCGGAAACTTTTAATGAACATTTCGGTACCCTAGCTAACGCGTTAAGTATCCCGCCTGAGTAGTACGCTCGCAAGAGTGAAACTCAAAGGAATTGACGGGGGCTCGCACAAGCGGTGGAGCATGTGGTTTAATTCGATGCAAAGCGAAGAACCTTACCAGAGCTTGACAGTATGTATAAAAGTCTTAATAGAATATTTTATAAAATACATAAACAGGTGGTGCATGGCTGTCGTCAGCTCGTGTCGTGAGGTGTTGGGTTAAGTCCCGCAACGAGCGCAACCCTTGTTCGGAGTTATATAAGAAATATTCTTCGAAAACTGCC…
ARL-VII	GASP-38KC-557-E06	EU044198.1		TGCAAATCGAATGGGAGACAGCGAGCTCTCATGGTGAACGGGTGAGTATAACATGAGAATCAACCATTAGACAAGGTATAACAAGAGGAAACTTTTAGTAATCCCTTATATGCGCAGTAGTGCTGAGAAAGGTTAATTTAATTAGATAAGGACCGTCTATAAACGAGCTCATGCCTGATTAGCTAGTTGGCGAGGTAAAGGCTCACCAAGGCGAAGATCAGTAGCTGGCCTGAGAGGGTGGTCAGCCACATTGGGACTGAGACACGGCCCAAACTCCTACGGGAGGCAGCAGTGGGGAATCTTCTGCAATAAGCGCAAGCTTGACAGAGCGACGTCACGTGAAGGAAGACGGCTACAAATTAGTTGTAAACTTCTTTTGCTGAGTTGTGAATACTGACA…
ARL-VIII	MannTurf_Z5_220330	GD5Q3M401DRRD6		AGAGTTTGATCCTGGCTCAGGATGAACGCTAGAGACGCACATTACACATGCAAGTTAATGATCTAATCTTTTTAGATCATAGCGAACTGGTGAGTAATAAATGAGAATTAAACTATAGGTCAGGAATAAATTTTTTATAATTCCTGTTAAGCGCATACATAGTGCTAAAAAAGGTTTTAGTACCGCCTATAACCAAGCTCATATCTGATTAGCTAGTTGGTAAGGTAAAGGCTTACCAAGGCGATGATCAGTAGCTGGCCTGAGAGGGTGATCAGCCACATTGGGATTGAGATACAGCCCAAACTCTTTTAAGAGGCAGCAGTGGGGAATATTCTGCAATGAGCGCAAGCTTGACAGAGTGACGTCTCGTGAAGGAAGACAGCCTTTTGGTTGTAAACT…
ARL-IX	Woods-Hole_a5143	KF798938.1		AGAGTTTGATCATGGCTCAGGATGAACGCACAAGACGCACATAATACATGCAAGTTGAATGGTGTTAAAACTTTAGGTTTTTTTTACCATAGCGAACGGGTGAGTAATACATAAAAGTCAAAGTTTAGATTAGAACTAATAAAAAGAAATTTTTGGTAATGTCTAATTAACGCATTTAATAGTGTTTTACAAAGGATTTTCTAATATTAAATCCGTCTATACTTGAATTTATGTCTGATTAGCTAGTTGGTAAAGTATAAGCTTACCAAGGCGATGATCAGTAGCTGTCCTGAGAGGGTGGTCAGCCACATTGGGATTGAGATAAGGCCCAAACTCCTACGGGAGGCAGCAGTAGGGAATTTTCTGCAATGAGCGTAAGCTTGACAGAGTGACGTCAGG…
ARL-XII	clone_II-40	KU878562.1		CAATAAAGTTAAAAAGTATCGGCTAANTCCGTGCCAGCAGCCGCGGTAAGACGGGGGATACAGGCGTTATCCGGAATTACTAGGCGTAAAGCGTCTGTAGGTGGTCATATGTGTTNTTACTTAAATCATGAGGCCTAACTTCATGTAATATAAGAAAACTATAAGACTAGAGTAAATTATGGGTAAGAGGANTTCTTCGAGGAGTAGTGAAAAGCGCAGATACGAAGGAGAAGACCATAAGCGAAGGCTTCTTACTTGGTTTGATACTGACATTGAGAGACGAAAGCTAGGGGAACGAATGGGATTAGATACCCCAGTAGTCCTAGCCGTAAACGATGGGTACTCGGTGCTGAATAGAATACAGCACCCTAGCTAACGCGTTAAGTATCCCGCCTGAGA…
ARL-XIII	HA04JAF01DBNNZ	VAMPS database	yes	TGGGCGTAAAGCGTTTGTAGGTGGTTTAATGTGTTCTAAGTGAAATTGTGTAGCTTAACTTCATAAATTAAGAAACTATTAAACTAGAGTATAGTAGAGGTAAGAGGAATTTTTCGAGAAGCAGTGAAATGCGAAGATACGAAAGAGATGACCAAAGCGAAGGCTTCTTACTGGGTTATTACTGACACTGAGAGACGAAAGCTAGGGGAGCAAATGGGATTAGATACCCCAGTAGTCCTAGCCGTAAACAATGGGTACTCGGTATTGAAAAAAGTTTTTCAGTACCTTAGCTAACGCGTTAAGTACCCCGCCTGAGGAGTACGCTCGCAAGAGTGAAACTCAAAGGAATTGACGGGGGCTCGCACAAGCGGTGGAGCATGTGGTTTAATTCGATGTAAC…
ARL-XIV	HA04JAF01AHE0D	VAMPS database	yes	TGGGCGTAAAGCGTCTGTAGGTTGTTTAATGTGTTCTTAATGAAATCAAGAAGCTTAACTTCTTTGGGTTTAAGAAAACTATTAAACTTGAGTAAGATAGAGGTAAGGGGAATTCTTTGAGGAGTAGTGAAATGCGAAGATACAAAGGAGAAGATCAAAAGCGAAAGCTTCTTGCTGAGTCTTTACTGACACTGAGAGACGAAAGCTAGGGGATCAAATGGGATTAGATACCCCAGTAGTCCTAGCCGTAAACTATGGGTACTCGGTGCCGAAAAATATTATATTTTCGGTACCTTAGCTAACGCGTTAAGTACCCCGCCTGAGGAGTACGCTCGCAAGAGTAAAACTCAAAGGAATTGACGGGGGGCTCGCACAAGCGGTGGAGCATGTGGTTTAATT…
ARL-XV	HA04JAF01BXQSV	VAMPS database	yes	CGTAAAGCGTTTGTAGATGGTATAATGTGTTCTTATATAGAAATAACAAGACTTAACTTTAGTAAAGATAAGAAACTATTATTGCTAGAGTATAATAGTAGGAAAGAGGTAATTTTTCGAGGAGTAGTGAAATGCGTAGATACGAAAGAGAAGGCCAAAAGCGAAAGCTTCTTTCTGGATTATTACTGACATTGAGAAACGAAAGCTAGGGTAGCAAATGGGATTAGATACCCCAGTAGTCCTAGCCGTAAATGATGGGTACTCGATACTTAAAACAAATTTTAAGTTTCTTAGCTAACGCGTTAAGTACCCCGCCTGAGGAGTACGCTCGCAAGAGTGAAACTCAAAGGAATTGACGGGGGCTCGTACAAGTGGTGGAGCATGTGGTTTAATTCGATG…
ARL-XVI	HA04JAF01DBE1B	VAMPS database	yes	TGGGCGTAAAGCGTCTGTAGGTTGTTTAATGTGTTCTTAGTGAAATCAAGAAGCTTAACTTCATGAGGTTTAAGAAACTATTAAACTTGAGTAAGATAGAGGTAAGAGAAATTCTTTGAGGAGTAGTGAAATGCGAAGATACAAAGGAGAAGATCAAAAGCGAAGGCTTCTTGCTGGGTCTTTACTGACACTGAGAGACGAAAGCTAGGGGAGCAAATGGGATTAGATACCCCAGTAGTCCTAGCCGTAAACTATGGGTACTCGATGCTGAGAAATATTATATTTTCAGTATCTTAGCTAACGCGTTAAGTATCCCGCCTGAGGAGTACGCCCGCAGGGGGTTAAACTCAAAGGAATTGACGGGGGCTCGCACAAGCGGTGGAGCATGTGGTTTAATTC…
ARL-XVII	GYT1HSZ02FRQLG	VAMPS database		TGAGGAATTTTCTGCAATGAGCGAAAGCTTGACAGAGTGATACCACGTGAAGGAGGAAGGTCATATTAGATTGTAAACTTCTTTTACTTATTGATAGAATATTGACTATTTAAGTGAATAAGTATCGGCTAACTTCGTGCCAGCAGCCGCGGTAATACGGGGGATACAAGCGTTATTCGGAATTATTGGGCGTAAAGTGTTTGTAGGCGGTTTAGTGTATTATTAATACAATAAATATAAAAATTTTATTTAATATTAATAGGATTATTAATCTAGAGTATGAGAGGGACAAAAGGAATTTTTCGAGTAATAGTAAAATATGATGATACGGAAAAGAAGATCAATAGCGAAAGCATTTTGTTGGTTCATTTTACTGACGCTGAGAAACGAAAGTTAAGG…
ARL-XVII	HDH3O3U01DOP8P	VAMPS database	yes	TGGGCGTAAAGTGTTGTAGGCGGTTTAGTGTATTATTAATACAATAAATATAAAATTTTATTTAATATTAATAAGATTATTAATCTAGAGTATGAGAGGGACAAAAGGAATTTTTCGAGTAATAGTAAAATATGATGATACGGAAGAGAAGATCAATAGCGAAAGCATTTTGTTGGTTCATTTTACTGACGCTGAGAAACGAAAGTTAAGGTAGCGAATGGGATTAGATACCCCAGTAGTCTTAACTGTAAACAATGGATACTTAGTATTTGAATATAAAAACTTTTAAGTACTAAAGCTAACGCGTTAAGTATCCCGCCTGAGGAGTACGTTCGCAAGGATAAAACTCAAAGGAATTGACGGGGGCTCACACAAGCGGTGGAACATGTGGGTTAATTC…
ARL-XVIII	HA04JAF01ATPEX	VAMPS database	yes	TGGGCGTAAAGTGTATGTAGATGTTATATTATATTATAATTATTAAAATATATTTATAAATAATTATATAACTAGAATTATATTCGTAGGGTAAAAGGTAATTTTTTGAGTAGTGGTAGAAATGACAATGATAACAAAAAAGAAGAACCAAAAGCGAAAGCTATTTTACTAAATTATAATTAACATTAAATACGAAGTTAAGGTAGCGAATGGGATTAGATACCCCAGTAGTCTTAACTGTAAACTATAGACACTAAATATAAATAATATATATTTACAATATTTTTAATATTTTTAGCTAACGCGTTAAGTGTCTCGCCTGAGTAGTACGTTCGCAAGAATGAAACTCAAAGGAATTGACGGGGGCTCGCACAAGCGGTGGAGTATGTGGTTTAATTC…
ARL-XIX	GFNCJI202JHJVA	VAMPS database	yes	AAGTGTCTATAGATGGGTTATAATGTCTTATATTAATATTGTAATTTTAATATACAAATTAATTAGAAACTTGGAATCTAGTGTATTGTAGATATATTGAGAATTCTTGGTGTAGAGGTAAAATTCGTAGAGTTCAAGAGGAATACTTACAGCGGAGGCGAGATATTGGATGATACTAAGACATTGAAGGACGAAAGCTAAGGTAGCAAATGGGATTAGATACCCCAGTAGTCTTAACTGTAAATAATGAAGATTAAGTCTTTTTTAAAATTATAAATTTTTACTAGGATCAAAAGCTAACGCGATAAATCTTCCGCCTGGGGAGTATGTTCGCAAGGATAAAACTTAAAGGAATTGACGGGGATTTGCACAAGCGGTGGAGTATGTGATTTAATTCGA…
ARL-XIX	GFNCJI202JSEVG	VAMPS database	yes	GGGCGTAAAGTGTCTATAGATGGGTTATAATGTCTATATTAATATTGAATTTATATCAAATTAATTAGAAACTTGGAATCTAGTGTATTGTAGATATATTGAGAATTCTTGGTGTAGAGGTAAAATTCGTAGAGTTCAAGAGGAATACTTACAGCGGAGGCGAGATATTGGATGATACTAAGACATTGAAGGACGAAAGCTAAGGTAGCAAATGGGATTAGATACCCCAGTAGTCTTAACTGTAAATAATGAAGATTAAGTCTTTTTTAAAAATTATAAATTTTTACTAGGATCAAAAAGCTAACGCGATAAATCTTCCGCCTGGGTAGTATGTTCGCAAGGATAAAACTTAAAGGAATTGACGGGGGATTTGCACAAGCGGTGGAGTATGTGATTTAA…
ARL-XX	HA04JAF01D0B3R	VAMPS database	yes	TAAAGCGTTTGTAGATTTTTTTATATATTAATAATTAAAAAATAAGACTTAATCTTATTATATGTATTAACATTATAAAAATATGAGTTTTTTGTAAGGCAAAAGGAATTTTTTTAAGTAATAGTGAAATATATCAAGATAAAAAAGAACTTGTTTGGCATATGCATTTTGCTATATTAAAAACTGACATTGAGAAACGAAAGCTAAGGGAGCAAAAGGGATTAGATACCCCTGTAGTCTTAGCCGTAAATGATGGATATTAAATATTATTAATATTATAATATTTAAGCTAACGCATTAAATATCCCGCCTGAGGAGTATTTTTGCAAAAATGAAACTTAAAGGAATTGACGGGAACTTGCACAAACAGTGGAACATGTGGTTTAATTCGATGCAACA…
Digyalum	Digyalum oweni WS3	DN13124_c4_g1_i1		TGGGTTTGATCCTGGCCCAGAATGAATGCGAGAATCGATGTACATTTACACATGCTAGTTTTATTTATTTATATTATTAATAAATGGCGTACGGGTGAGTAATATATAAGAACATTTTTATAGAAAAAGGTATAAATTACCTTAAAAGCAAAATAGCTAAATTAAAAAAAAATTTGTTTATAAAATGGCTTATATCTAATTAGTTTGTTGGGGAAAATAATAGTTTACCAAGACGATGATTAGTAGCCGGCTTGAGAGAGTGTACGGCCACACTGAGACTGAAACACGGCTCAGACTTTTACGAAAGGCAGCAGTGAGGAATAATTTGCAATAAGCGAAAGCTTGACAATATGACATCGCGTAAAGGAATAATATTTTATTTTTTAAATTTAAAATAAT…
Digyalum	Digyalum oweni WS1	DN31843_c2_g2_i4		TGGGTTTGATCCTGGCCCAGAATGAATGCGAGAATCGATGTACATTTACACATGCTAGTTTTATTTATTTATATTATTAATAAATGGCGTACGGGTGAGTAATATATAAGAACATTTTTATAAAAAAGGTATAAATCACCTTAAAGGCAGAATAGCTAAATTAAAAAAAATTTGTTTATAAAATGGCTTATATCTAATTAGTTTGTTGGGGAAAATAATAGTTTACCAAGACAATGATTAGTAGCCGGCTTGAGAGAGTGTACGGCCACACTGAGACTGAAACACGGCTCAGACTTTTACGAAAGGCAGCAGTGAGGAATAATTTGCAATAAGCGAAAGCTTGACAATATGACATCGCGTAAAGGAATAGTATTTTATTTTTTAAATTTAAAATAATTA…
apicomplexans	Rhytidocystis sp. 1	DN16081_c0_g2_i7		TAAATTTAATCTTAGTTTATATATAAATATTTTAAATATACTTAATACATGCTAGTTATTAGTGTATTTATACTAAAGCTTTAAAGTGAGTTTAATTATATTAAAAAAAGTATTTTTTATAAAAAATATATACATATTTATATGTAATTAAAAAAATTTTAATTGACTTTTAAAATATATTTAAAAATATTAATTATTTAATAAATATTTATTTATTAAAATTATTATATTTAAGGTGTTAAATATTATATTTACATCTCACTAAATTTTTAAAAAAAATTTTAGCAGTAGGGAATATTTTACAATAAACTAAAGTTTGATAAAATAATATTTAATTTTGGATGAAGGTTATAAATAATTGTAAACAACTATAGATTTTTATTTTATATAAAAATTAAA…
apicomplexans	Rhytidocystis sp. 2	DN5124_c6_g2_i2		ATAATTTAATCCTGGTTAATTTTTAATACTTTAAATTTATCTTTATACATGCAAGTTAATTTTTTAAATTATTTAAAATAGCTTAAATATGAGTAATTATAAAAATTATTATTTTAAATTTAATTTATAGAAATAATTAATAAAAACATAAAAATTAAGTTTTTAAAAAATTTATTAATAATTTAAAAAAAATTTTATATATTATTAACTAATTAATAAAATAAGATTTATTAAGGTTAAAATAATTAATTATTACAAATAAATAATCATATTAAAATTTAAAAAAAATTTAATCTATAAAAATAGACAGCAGTAAATAATATTTTGCAATAAACGTAAGTTTGACAAAGTAAAATTTAGCAAAGGAATAAAATAATTTTTATTTTAAACTTTTTATAT…
apicomplexans	Eleutheroschizon duboscqi	DN24494_c1_g2_i2		AGAGTTTGATCCTGGCTCAGGATGAACGCTAGTGATGTGCCTAACACATGCAAATCAAAAGGAAGTTTTCCTTGGTGTACCGGTGAGTAATGCATAAAAATCTAATTTTAAATTTGGGATAACTTTTAATGAGAAAACCCAAATAGTCACATATGTGAAAATAAAAAATATTATTATTGTTTAAAATTGAATTTATGTCTGATTAGCTTTTTAGTATAATAATCTATACTTAAGCGATAATCAGTAGCTGCCCTGTGAAGGGGGTCAGCCACACTAGGATTGAAATAAGGCCTAGACTTTTTAGGCAGCAGTGGGGAATTTTCTGCAATGAGCGCAAGCTTGACAGAGCAACATCACGTGAAGGATGAAAGCCTTTTGGTTGTAAACTTCTTTTATATT…
apicomplexans	Selenidium pygospionis	DN14258_c1_g1_i7		TAAGTATGATCCTGGCTTGGAATTAACGCGCATTGGTTATATCTTACACATGCAAGTTTAAACTTATTAAATTCTAGTTAATGTATTTGATTTAAATTTTATTAAAATTTTAACAATTTATATACAAATAGTTTTTAATATTATATTAATCTAAATTAAGCGAAAAGGTGTAGAATTGCTATAATATATAATATAGAAACGCTAGTATTAATTTTAATTTTATTTATTAAATTATATTGATACTTATTTAAGTGTTAAAAAAGAGCTCACTAATTAATATGGAAGAGGGCTATATAAAGATATTAAAGCACCGATTAACAATCAGATAGATTAATAATCTATTAAAATAATTTAATTAAATCTGTAAGTGAAGATCGGTAACTAATCTGAGAGGGCTAT…
apicomplexans	Siedleckia nematoides	DN22185_c1_g8_i1		TGAGTTTGATCCTGGCTCAGGATTAATGCGATTTAGTATACCTTACACATGCTAGTTTATAATATTTTTTATTATAGCGTATTGGTGAGTATTTGTATAAGTAAATCATGATTAGATAAAAAATAATACATAAAGTTTTATATACATAAATAAAATTAATAATATGTTTTTAAAAATTATAATTGTCTGGTCATGTTGTTATATTTGATTAACTATAAATTTAACTTATAATTTAAATTTAGTGATTATCAATAGTTGATTTGAGAGAATGGTCAACCACATTAAAATTGAAATACAATTTAAACTTTTTATAAAGGCAGCAGTGGGGAATATTCTGCAATGAATGCAAATTTGACAGTGTAGTACTAAGTGAAGGAAGACAGCTTTTTTGTTGTAAAC…
apicomplexans	Siedleckia nematoides	DN50536_c10_g1_i1		TGAGTTTGATCCTGGCTCAGGATTAATGCGAATTAGTATATCTAACACATGCTAGTTTATAATATTAAATTATTATAGCGTACTGGTGAGTAACATATAATTAAGTTATTATTTAGATAAAAAATAATAAATAAAGTTTTATATACATAAAAATGTAATAAATATGTTTTTAAAAATTTATTATTGTCTAATTATACTATTATATTTGATTAACTATAGATTTAAATTAAATTTAGTGATTATCAATAGCTGGTTTGAGAGAATGATCAGTCACATTAAAATTGAAATACAATTTAAACTTTTAAAAAGGCAGCAGTGGGGAATATTCTGCAATGAATGCAAATTTGACAGTGTAATACTAAGTGGAGGAAGACAGCTTTTAGTTGTAAACTTCTTTAT…
