# Supplementary material for: Apicomplexan-like parasites are polyphyletic and widely but selectively dependent on cryptic plastid organelles
Source: eLife. 2019 Aug 16;8:e49662. doi: 10.7554/eLife.49662 (PMC6733595; doi:10.7554/eLife.49662)
Supplement: Supplementary file 7. [file elife-49662-supp7.xlsx]

## Sheet: Sheet1
Table S7: Plastid transcriptomic contigs in species newly sequenced in this study
Species	Plastid contig	Genes identified	Length (bp)	AT content
Digyalum oweni WS1	DN31655_c1_g4_i1	rpoA; rps3, 5, 8, 12, 13, 17, 19; rpl2, 4, 5, 6, 13, 14, 16, 31	12165	0.765
Digyalum oweni WS1	DN31843_c2_g2_i4	rns; rnl; rpl19	5183	0.7411
Digyalum oweni WS1	DN31843_c2_g3_i1	rps14; rpl20	3512	0.7993
Digyalum oweni WS1	DN31902_c1_g2_i1	sufB	3399	0.767	UGA=W
Digyalum oweni WS1	DN31910_c2_g1_i5	rnl	2985	0.7323
Digyalum oweni WS1	DN32040_c1_g1_i1	clpC; rpoC1, C2; rps4, 11; rpl11, 27	16537	0.7674
Digyalum oweni WS1	DN32080_c4_g1_i4	tufA; rpoB; rnl3	10796	0.7607
Eleutheroschizon duboscqi	DN24494_c1_g2_i2	rns; trnL(tag), N(gtt), A(tgc)	1838	0.6507
Eleutheroschizon duboscqi	DN24931_c4_g1_i3	sufB; rns; rnl; trnI(gat), R(tct), V(tac), R(acg), T(tgt), G(tcc)	5093	0.7202	UGA=STOP
Eleutheroschizon duboscqi	DN24931_c4_g2_i2	clpC; rpoB, C1, C2a; C2b; trnS(tga)	21299	0.7959
Eleutheroschizon duboscqi	DN25579_c4_g1_i1	tufA; rps3, 4, 5, 7, 8, 11, 12, 17; rpl2, 4, 6, 14, 16, 36; trnP(tgg), E(ttc), K(ttt), D(gtc), S(gct), M(cat), Y(gta), C(gca), H(gtg)	11064	0.7929
Rhytidocystis sp. 1	DN16081_c0_g2_i1	rns; sufB	2891	0.8354
Rhytidocystis sp. 1	DN16490_c2_g1_i7	rps12; rnl	4872	0.8645	UGA=W
Rhytidocystis sp. 1	DN16490_c2_g2_i2	rpl14	3806	0.917
Rhytidocystis sp. 1	DN16490_c2_g3_i2	clpC	1847	0.8733
Rhytidocystis sp. 1	DN20917_c0_g1_i1	rps4; trnY(gta)	1217	0.908
Rhytidocystis sp. 2	DN5124_c6_g1_i1	clpC	1352	0.8905
Rhytidocystis sp. 2	DN5124_c6_g2_i2	rns; rnl; sufB; rps2, 12; rpl14; trnM(cat)	23907	0.9112	UGA=?
Selenidium pygospionis	DN14258_c1_g1_i7	rns; rnl; trnN(gtt), L(tag)	5396	0.8054
Selenidium pygospionis	DN14319_c0_g3_i1	sufB	2033	0.8239
Selenidium pygospionis	DN14446_c2_g1_i2	rps8; rpl14, 16	4280	0.84
Selenidium pygospionis	DN15044_c0_g1_i9	tufA; trnQ(ttg)	3584	0.8066
Selenidium pygospionis	DN15364_c0_g1_i6	rpoC1, C2a, C2b	5470	0.823
Selenidium pygospionis	DN16356_c5_g1_i26	clpC; rpoB; rps4, 12; rpl2; trnP(tgg)	16127	0.8156	UGA=W
Siedleckia nematoides WS1	DN22185_c1_g8_i1	rns; trnV(tac), N(gtt), M(cat)	2064	0.7718
Siedleckia nematoides WS1	DN22287_c0_g2_i1	clpC; rpoC2b; rps2, 16; trnS(tga)	4109	0.8683
Siedleckia nematoides WS1	DN27225_c1_g1_i1	rpoB; rpoC1; rpoC2a; trnT(tgt), R(acg), A(tgc), R(tct), I(gat)	7635	0.8519
Siedleckia nematoides WS1	DN29396_c10_g1_i1	rnl; trnD(gtc), trnS(gct), Y(gta), K(ttt), E(ttc), P(ttg)	1969	0.8527
Siedleckia nematoides WS1	DN29396_c10_g2_i2	sufB; clpC; tufA; rps3, 4, 5, 7, 8, 12; rpl2, 6, 14, 16, 36; trnG(gcc), Q(ttg), F(gaa), H(gtg), M(cat)	22816	0.8502	UGA=W
