# Supplementary figures and images for: Apicomplexan-like parasites are polyphyletic and widely but selectively dependent on cryptic plastid organelles
Source: eLife journal article supplement (doi:10.7554/elife.49662), 2019-08-16

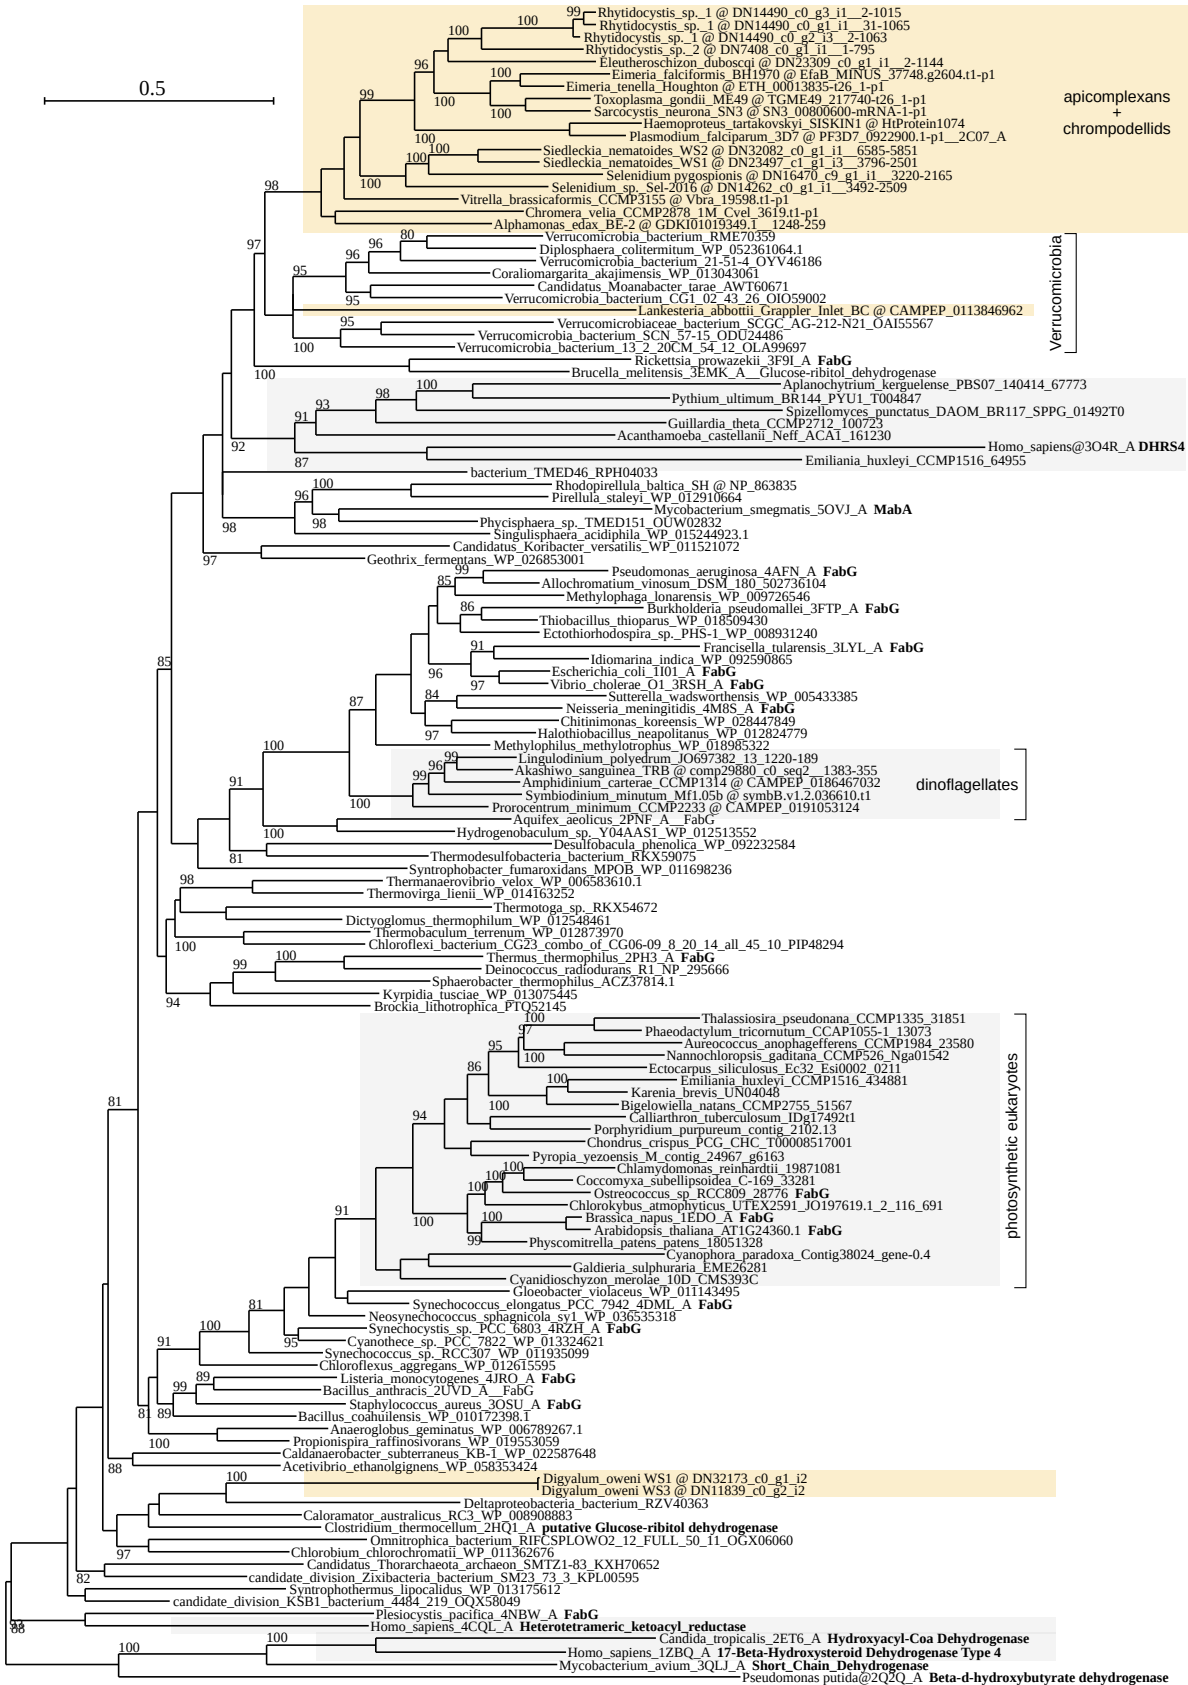

Supplement: supp [file elife-49662-supp-v1.zip]

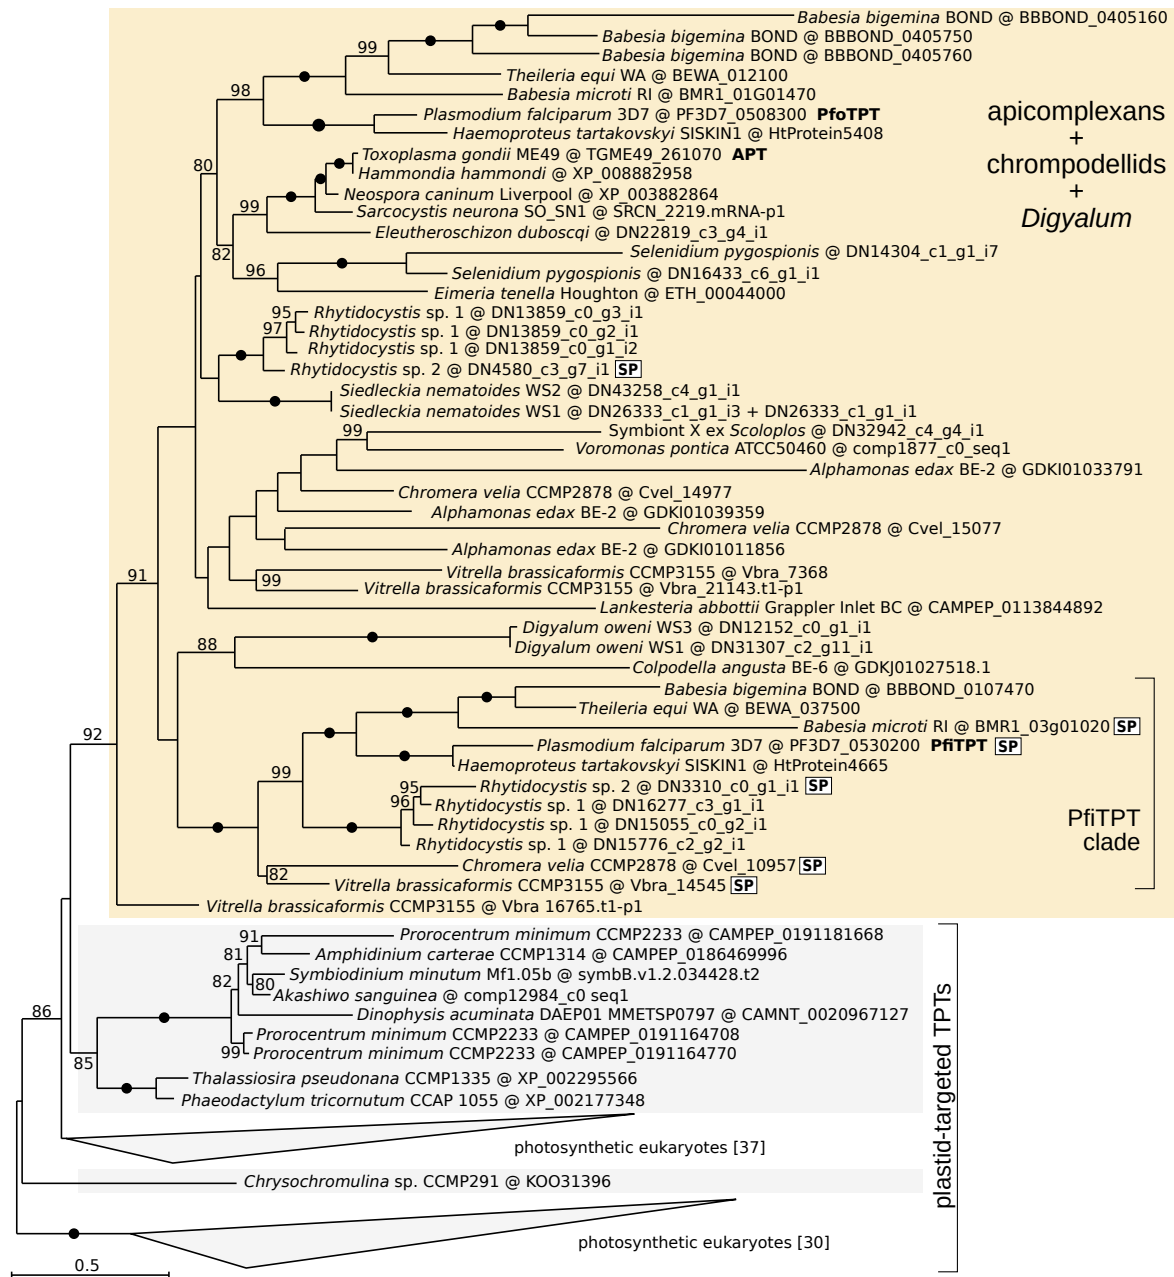

Supplement: supp [file elife-49662-supp-v1.zip]

A

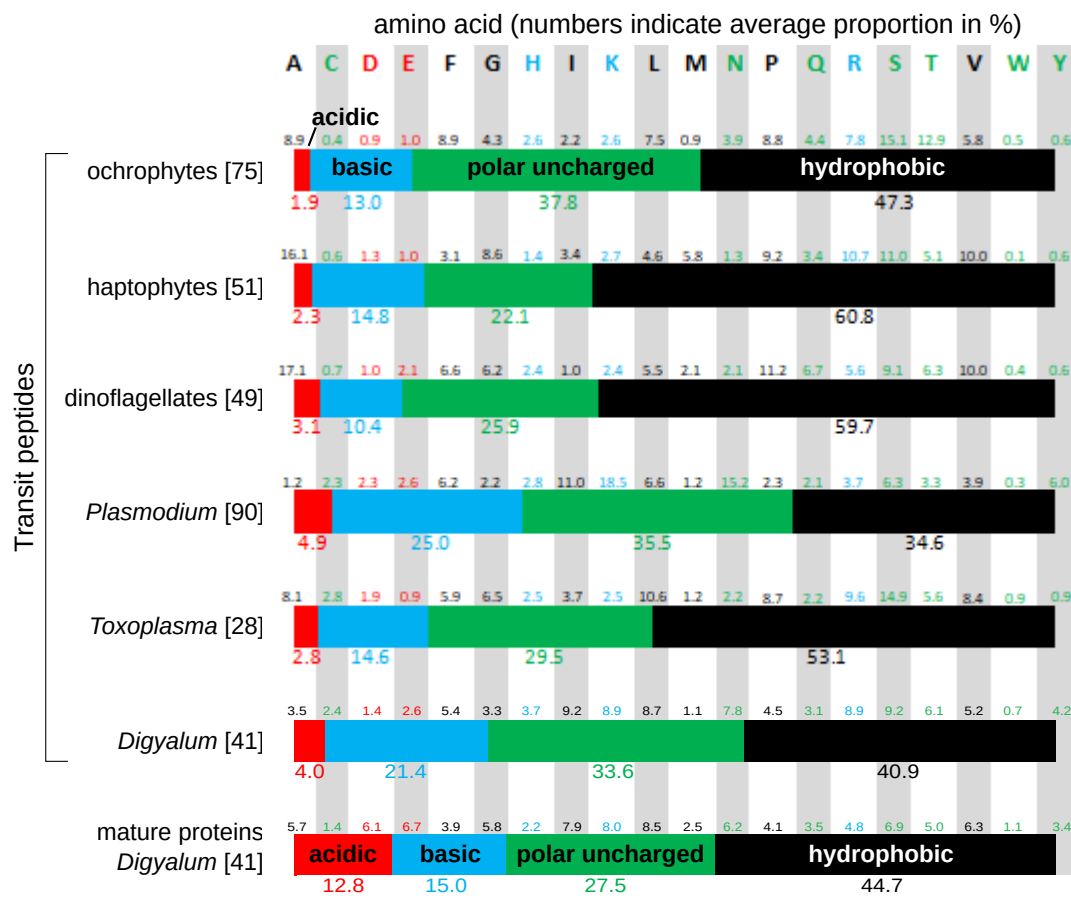

B

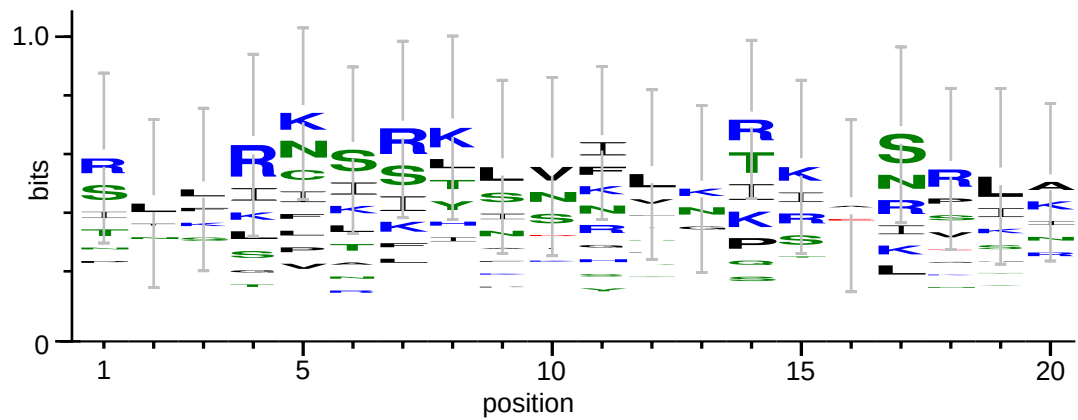

Supplement: supp [file elife-49662-supp-v1.zip]

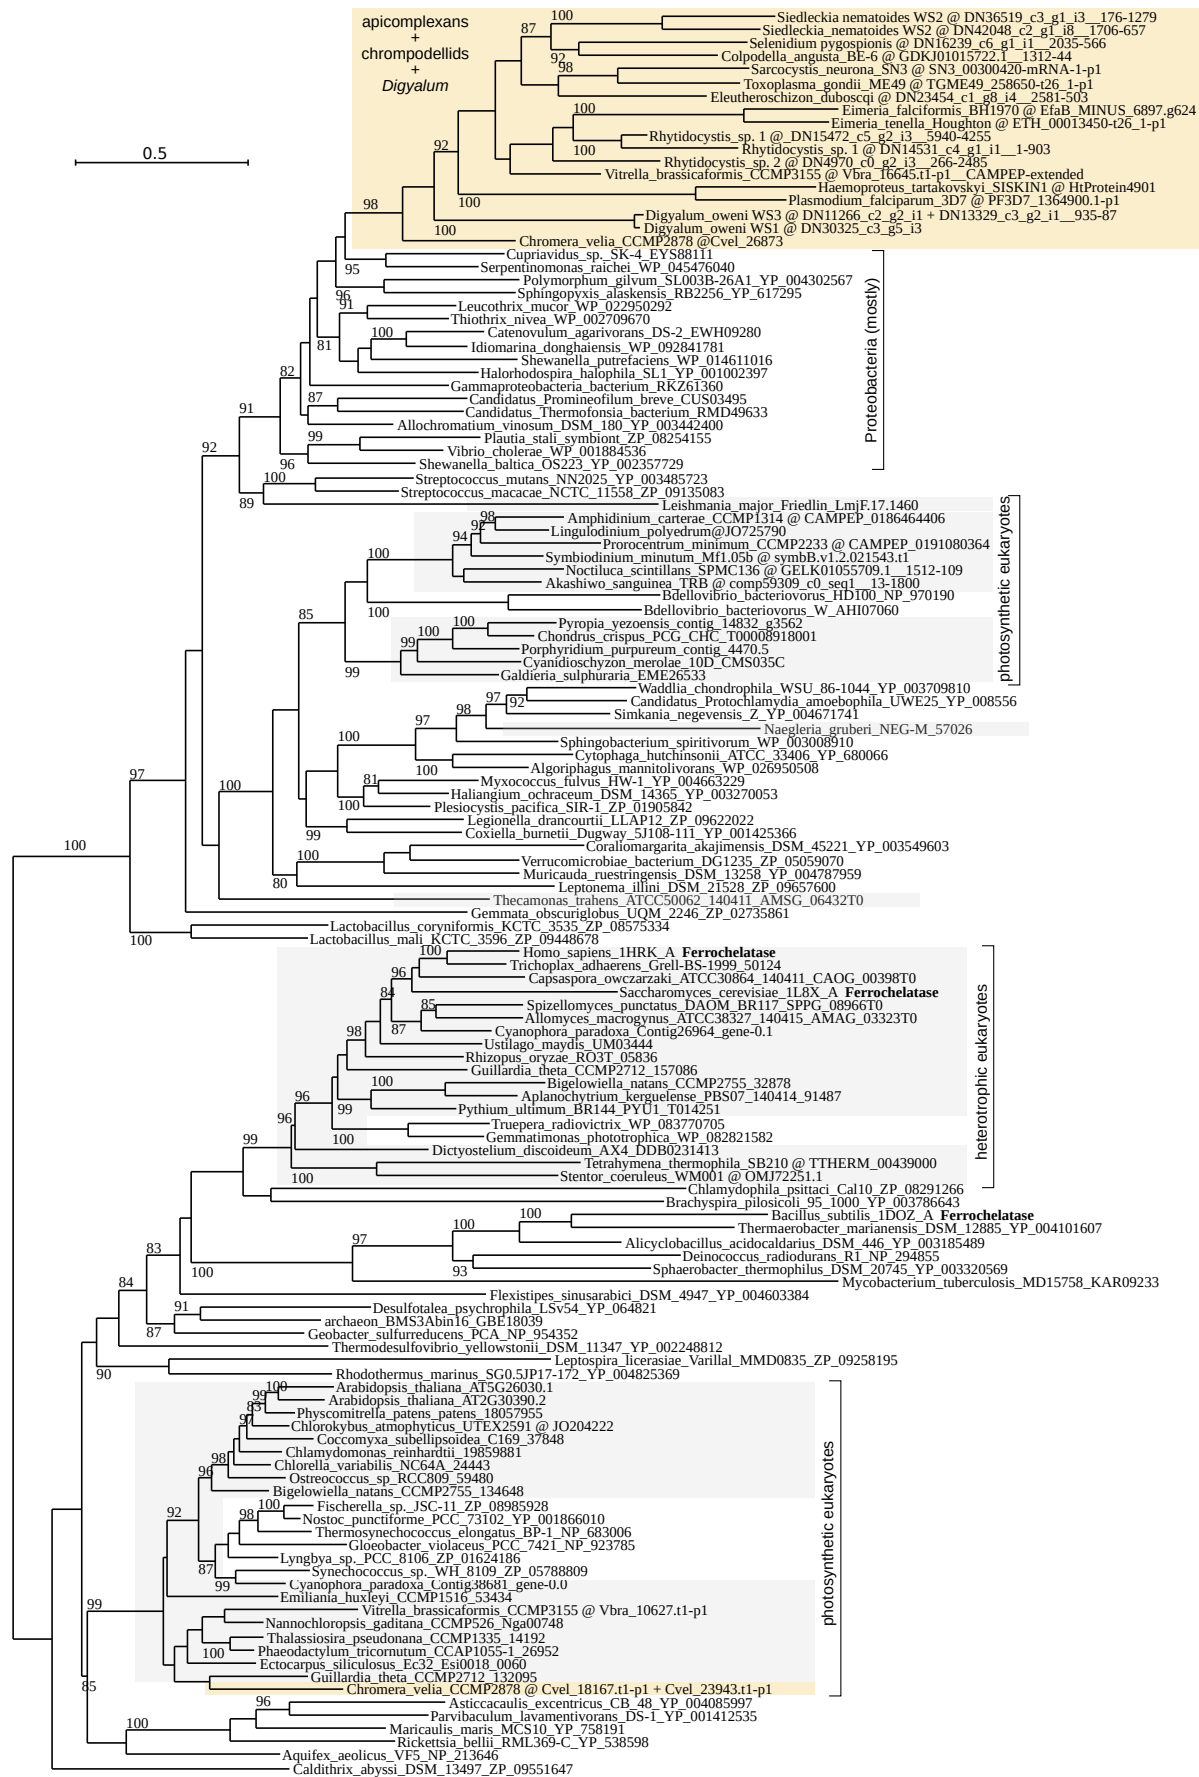

Supplement: supp [file elife-49662-supp-v1.zip]
